# Supplementary material for: Influence of Social Determinants of Health on Heart Failure Outcomes: A Systematic Review
Source: PubMed Central journal article supplement — J Am Heart Assoc. 2023 Jan 25;12(3):e026590. doi: 10.1161/JAHA.122.026590 (PMC9973629; doi:10.1161/jaha.122.026590), 2023-01-25

# Supplemental Material

**Table S1. Literature Search Strategies.**

| Database                                                                                                                                                          | Search Strategy                                                                                                                                                                                                                                                                                                                                                                                                                                                                                                                                                                                                                                                                                                                                                                                                                                                                                                                                                                                                                                                                   |
|-------------------------------------------------------------------------------------------------------------------------------------------------------------------|-----------------------------------------------------------------------------------------------------------------------------------------------------------------------------------------------------------------------------------------------------------------------------------------------------------------------------------------------------------------------------------------------------------------------------------------------------------------------------------------------------------------------------------------------------------------------------------------------------------------------------------------------------------------------------------------------------------------------------------------------------------------------------------------------------------------------------------------------------------------------------------------------------------------------------------------------------------------------------------------------------------------------------------------------------------------------------------|
| PubMed                                                                                                                                                            | ((((("Time Factors"[MeSH Terms] AND Journal Article[ptyp] AND hasabstract[text] AND "last 10 years"[PDat] AND Humans[Mesh] AND English[lang])) OR ("Predictive Value of Tests"[MeSH Terms] AND Journal Article[ptyp] AND hasabstract[text] AND "last 10 years"[PDat] AND Humans[Mesh] AND English[lang])) AND Journal Article[ptyp] AND hasabstract[text] AND "last 10 years"[PDat] AND English[lang])) AND (((("United States"[Mesh] AND Journal Article[ptyp] AND hasabstract[text] AND "last 10 years"[PDat] AND Humans[Mesh] AND English[lang])) AND (((((((("Hospitalization"[Mesh]) OR "Patient Readmission"[Mesh]) OR "Emergency Service, Hospital"[Mesh]) OR ("mortality"[All Fields] OR "mortality"[MeSH Terms])) OR complications)) AND "Heart Failure"[Mesh]) AND Journal Article[ptyp] AND hasabstract[text] AND "last 10 years"[PDat] AND Humans[Mesh] AND English[lang])) AND Journal Article[ptyp] AND hasabstract[text] AND "last 10 years"[PDat] AND Humans[Mesh] AND English[lang]) Filters: Journal Article; Abstract; published in the last 10 years; English |
| SCOPUS                                                                                                                                                            | ( ( TITLE-ABS-KEY ( heart AND failure ) ) AND ( TITLE-ABS-KEY ( hospitalization OR patient AND readmission OR ( emergency AND service, AND hospital ) OR mortality OR complications OR hospital AND emergency AND department ) ) ) AND ( ( TITLE-ABSKEY ( "Predictive Value of Tests" ) OR TITLE-ABS-KEY ( time AND factors ) ) ) AND ( LIMITTO ( AFFILCOUNTRY , "United States" ) )                                                                                                                                                                                                                                                                                                                                                                                                                                                                                                                                                                                                                                                                                              |
| Cumulative Index to Nursing and Allied Health Literature (CINAHL)                                                                                                 | ((MH "Heart Failure+") OR "heart failure") AND (((MH "Hospitalization+") OR "hospitalization") OR ((MH "Readmission") OR "Readmission") OR (MH "Emergency Service+") OR (MH "Mortality+") OR "complications") AND ((MH "Predictive Value of Tests") OR "Predictive Value of Tests") Limiters - Abstract Available; Published Date: 20100101-20201231; English Language                                                                                                                                                                                                                                                                                                                                                                                                                                                                                                                                                                                                                                                                                                            |
| ABI_INFORM                                                                                                                                                        | (MAINSUBJECT.EXACT("Heart failure") AND (MAINSUBJECT.EXACT("Patient admissions") OR MAINSUBJECT.EXACT("Hospitalization") OR MAINSUBJECT.EXACT("Emergency services") OR complications OR MAINSUBJECT.EXACT("Mortality"))) AND ((Predict* OR MAINSUBJECT.EXACT("Predictions")) AND Factor) AND (loc.exact("United States--US") AND at.exact("Article") AND stype.exact("Scholarly Journals"))                                                                                                                                                                                                                                                                                                                                                                                                                                                                                                                                                                                                                                                                                       |
| Web of Science                                                                                                                                                    | (Heart Failure) AND ((Hospitalization OR Readmission OR (Emergency Service, Hospital) OR mortality OR complications OR (Hospital emergency department)) AND ((Time Factors) OR TOPIC: ("Predictive Value of Tests")) Refined by: LANGUAGES: ( ENGLISH ) AND DOCUMENT TYPES:( ARTICLE OR REVIEW OR PROCEEDINGS PAPER ) AND COUNTRIES/REGIONS: ( USA ) Indexes=SCI-EXPANDED, SSCI, A&HCI, ESCI Timespan=2010-2020                                                                                                                                                                                                                                                                                                                                                                                                                                                                                                                                                                                                                                                                   |
| <p>A&amp;HCI- Arts &amp; Humanities Citation Index</p> <p>ABS- Abstract</p> <p>AFFILCOUNTRY- Affiliation Country</p> <p>ESCI- Emerging Sources Citation Index</p> |                                                                                                                                                                                                                                                                                                                                                                                                                                                                                                                                                                                                                                                                                                                                                                                                                                                                                                                                                                                                                                                                                   |

KEY- Keyword

Lang- Language

MeSH- Medical Subject Headings

PDat- Publication Date

Ptyp- Publication Type

SCI-EXPANDED- Science Citation Index Expanded™

SSCI- Social Sciences Citation Index

**Table S2. Detailed Description of Evidence: The Influence of SDOH on HF Outcomes.**

| Author (Study Type)                                         | Setting (Obs. Dates)                                                                                                                                          | Target Population                                                                                                                                                          | Data Source(s)                                                                                                                         | Control Variables                                                                                                | SDOH Variables Analyzed in Study                                                                                                                       | Outcome                                                                        | Outcome Results†                                                                                                                                                   | QR‡ |
|-------------------------------------------------------------|---------------------------------------------------------------------------------------------------------------------------------------------------------------|----------------------------------------------------------------------------------------------------------------------------------------------------------------------------|----------------------------------------------------------------------------------------------------------------------------------------|------------------------------------------------------------------------------------------------------------------|--------------------------------------------------------------------------------------------------------------------------------------------------------|--------------------------------------------------------------------------------|--------------------------------------------------------------------------------------------------------------------------------------------------------------------|-----|
| <b>Mortality and Survival</b>                               |                                                                                                                                                               |                                                                                                                                                                            |                                                                                                                                        |                                                                                                                  |                                                                                                                                                        |                                                                                |                                                                                                                                                                    |     |
| Ahmed 2018 <sup>13*</sup><br>(Retrospective Observational)  | <ul style="list-style-type: none"> <li>University of Florida</li> <li>(Jan 2008-Dec 2015)</li> </ul>                                                          | <ul style="list-style-type: none"> <li>Population: Patients ≥18 years with LVAD implant, PS assessment, 1 year or more post-op</li> <li>Sample: N=111</li> </ul>           | <ul style="list-style-type: none"> <li>EMR</li> </ul>                                                                                  | <ul style="list-style-type: none"> <li>Age</li> <li>Sex</li> <li>Race</li> </ul>                                 | <ul style="list-style-type: none"> <li>Insurance</li> <li>Education</li> <li>Income</li> <li>Marital status</li> <li>Urban/ rural residence</li> </ul> | <ul style="list-style-type: none"> <li>Survival 1 year post implant</li> </ul> | <ul style="list-style-type: none"> <li>No statistically significant associations found</li> </ul>                                                                  | 3   |
| Foraker 2011 <sup>32*</sup><br>(Prospective Observational)  | <ul style="list-style-type: none"> <li>Forsyth County, NC; Washington County, MD; suburbs of Minneapolis, MN; and Jackson, MS</li> <li>(1987-2004)</li> </ul> | <ul style="list-style-type: none"> <li>Population: White and Black ARIC participants aged 45-64 years</li> <li>Diagnosis: incident HFH</li> <li>Sample: N=1,342</li> </ul> | <ul style="list-style-type: none"> <li>ARIC study</li> <li>US Census</li> </ul>                                                        | <ul style="list-style-type: none"> <li>SexSex</li> <li>Race</li> <li>Education</li> </ul>                        | <ul style="list-style-type: none"> <li>Insurance</li> <li>Neighborhood SES</li> </ul>                                                                  | <ul style="list-style-type: none"> <li>Time to All-cause mortality</li> </ul>  | <ul style="list-style-type: none"> <li>Medicaid recipients: higher risk (HR 1.21, CI 1.07–1.37)</li> <li>Lower HHI: higher risk (HR 1.36, CI 1.08–1.70)</li> </ul> | 2   |
| Manemann 2018 <sup>44*</sup><br>(Prospective Observational) | <ul style="list-style-type: none"> <li>Clinics and hospitals in 11 southeast Minnesota counties</li> <li>(Jan 2013-Mar 2013)</li> </ul>                       | <ul style="list-style-type: none"> <li>Population: ≥18 years</li> <li>Diagnosis: First-ever HF diagnosis</li> <li>Sample: N=3,867</li> </ul>                               | <ul style="list-style-type: none"> <li>Patient-Reported Outcomes Measurement Information System Social Isolation Short Form</li> </ul> | <ul style="list-style-type: none"> <li>Age</li> <li>SexSex</li> <li>Education</li> <li>Marital status</li> </ul> | <ul style="list-style-type: none"> <li>Social Support</li> </ul>                                                                                       | <ul style="list-style-type: none"> <li>Time to All-cause Mortality</li> </ul>  | <ul style="list-style-type: none"> <li>High social isolation: higher risk (HR 3.74, CI 1.82-7.70)</li> </ul>                                                       | 2   |

|                                                                           |                                                                                                                         |                                                                                                                                                                                          |                                                                                                                                                                        |                                                                           |                                                                                                                                |                                                                                 |                                                                                                                                                                                                                                                                                  |   |
|---------------------------------------------------------------------------|-------------------------------------------------------------------------------------------------------------------------|------------------------------------------------------------------------------------------------------------------------------------------------------------------------------------------|------------------------------------------------------------------------------------------------------------------------------------------------------------------------|---------------------------------------------------------------------------|--------------------------------------------------------------------------------------------------------------------------------|---------------------------------------------------------------------------------|----------------------------------------------------------------------------------------------------------------------------------------------------------------------------------------------------------------------------------------------------------------------------------|---|
|                                                                           |                                                                                                                         |                                                                                                                                                                                          | <ul style="list-style-type: none"> <li>· Rochester Epidemiology Project</li> </ul>                                                                                     |                                                                           |                                                                                                                                |                                                                                 |                                                                                                                                                                                                                                                                                  |   |
| <p>McNaughton 2015<sup>46*</sup></p> <p>(Retrospective Observational)</p> | <ul style="list-style-type: none"> <li>· Quaternary care hospital</li> <li>· (Nov 2010 – Jun 2013)</li> </ul>           | <ul style="list-style-type: none"> <li>· Population: Discharged patients ≥18 years</li> <li>· Diagnosis: Acute HFH</li> <li>· Sample: N=2,132</li> </ul>                                 | <ul style="list-style-type: none"> <li>· Health Literacy Screening study data</li> <li>· EMR</li> </ul>                                                                | <ul style="list-style-type: none"> <li>· Insurance</li> </ul>             | <ul style="list-style-type: none"> <li>· Age</li> <li>· SexSex</li> <li>· Race</li> <li>· Education/health literacy</li> </ul> | <ul style="list-style-type: none"> <li>· Time to all-cause Mortality</li> </ul> | <ul style="list-style-type: none"> <li>· Low health literacy (BHLS ≤9): higher risk (aHR 1.32, CI 1.05-1.66).</li> <li>· Age ≥65 years, nonwhite race, and less than high school education: higher risk.</li> </ul>                                                              | 3 |
| <p>Downing 2018<sup>26*</sup></p> <p>(Retrospective Observational)</p>    | <ul style="list-style-type: none"> <li>· US non-federal acute care hospitals</li> <li>· (Jan 2009- Dec 2011)</li> </ul> | <ul style="list-style-type: none"> <li>· Population: Hospitals with Medicare FFS beneficiaries ≥65 years</li> <li>· Principal Diagnosis: AMI or HF</li> <li>· Sample: N=1,265</li> </ul> | <ul style="list-style-type: none"> <li>· Medicare Standard Analytic Files</li> <li>· Medicare Enrollment Database</li> <li>· 2011 American Community Survey</li> </ul> | <ul style="list-style-type: none"> <li>· Age</li> <li>· SexSex</li> </ul> | <ul style="list-style-type: none"> <li>· Race and Ethnicity</li> <li>· Income</li> </ul>                                       | <ul style="list-style-type: none"> <li>· Time to All-cause Mortality</li> </ul> | <ul style="list-style-type: none"> <li>· Black patients (AMI): no statistically significant association found</li> <li>· Black patients (HF): lower risk (RSMR: -4.7, P &lt; .001)</li> <li>· Low-income neighborhood: no statistically significant association found</li> </ul> | 3 |

|                                                                      |                                                                                                                                            |                                                                                                                                                              |                                                                                                                                 |                                                                                                         |                                                                                                                               |                                                                                 |                                                                                                                                                                                                                                   |          |
|----------------------------------------------------------------------|--------------------------------------------------------------------------------------------------------------------------------------------|--------------------------------------------------------------------------------------------------------------------------------------------------------------|---------------------------------------------------------------------------------------------------------------------------------|---------------------------------------------------------------------------------------------------------|-------------------------------------------------------------------------------------------------------------------------------|---------------------------------------------------------------------------------|-----------------------------------------------------------------------------------------------------------------------------------------------------------------------------------------------------------------------------------|----------|
| <p>Park 2016<sup>51</sup><br/>(Prospective Observational)</p>        | <ul style="list-style-type: none"> <li>· Cardiologist offices in Cincinnati, OH and Northern KY</li> <li>· (2007-2013)</li> </ul>          | <ul style="list-style-type: none"> <li>· Population: Patients &lt;45 years</li> <li>· Diagnosis: CHF</li> <li>· Sample: N=191</li> </ul>                     | <ul style="list-style-type: none"> <li>· EMR</li> <li>· Patient survey</li> </ul>                                               | <ul style="list-style-type: none"> <li>· SexSex</li> <li>· Marital status</li> </ul>                    | <ul style="list-style-type: none"> <li>· Age</li> <li>· Faith/spirituality</li> <li>· Social support</li> </ul>               | <ul style="list-style-type: none"> <li>· Time to All-cause Mortality</li> </ul> | <ul style="list-style-type: none"> <li>· Age: lower risk (HR 1.06, CI 1.03-1.09).</li> <li>· Spiritual: lower risk (HR 0.795, CI 0.67-0.95).</li> <li>· Social support: no statistically significant association found</li> </ul> | <p>2</p> |
| <p>Shen 2017<sup>58</sup><br/>(Prospective Observational)</p>        | <ul style="list-style-type: none"> <li>· Cardiology OP clinic at the University of Miami Medical Center</li> <li>· (2005- 2009)</li> </ul> | <ul style="list-style-type: none"> <li>· Population: Patients aged ≥18 years</li> <li>· Principal Diagnosis: HF</li> <li>· Sample: N=220</li> </ul>          | <ul style="list-style-type: none"> <li>· EMR</li> <li>· Patient survey</li> <li>· SSDI</li> </ul>                               | <ul style="list-style-type: none"> <li>· Age</li> <li>· SexSex</li> </ul>                               | <ul style="list-style-type: none"> <li>· Marital Status</li> <li>· Social Support</li> </ul>                                  | <ul style="list-style-type: none"> <li>· Time to All-cause Mortality</li> </ul> | <ul style="list-style-type: none"> <li>· Not married or partnered: higher odds (OR 2.80, CI 1.38-5.70)</li> <li>· Social support: no statistically significant association found</li> </ul>                                       | <p>2</p> |
| <p>Kostelanetz 2021<sup>42</sup><br/>(Prospective Observational)</p> | <ul style="list-style-type: none"> <li>· Vanderbilt University AMC</li> <li>· (Oct 2011- Dec 2015)</li> </ul>                              | <ul style="list-style-type: none"> <li>· Population: Adult admissions aged ≥18 years</li> <li>· Principal Diagnosis: HF</li> <li>· Sample: N=1120</li> </ul> | <ul style="list-style-type: none"> <li>· Patient questionnaire</li> <li>· Patient interviews</li> <li>· Billing data</li> </ul> | <ul style="list-style-type: none"> <li>· Age</li> <li>· SexSex</li> <li>· Race and Ethnicity</li> </ul> | <ul style="list-style-type: none"> <li>· Neighborhood SES</li> <li>· HHI</li> <li>· Education</li> <li>· Insurance</li> </ul> | <ul style="list-style-type: none"> <li>· Time to All-cause Mortality</li> </ul> | <ul style="list-style-type: none"> <li>· No insurance: lower risk (HR 0.43 CI: 0.24-0.77)</li> <li>· Neighborhood and household below FPL and completed HS: no statistically significant association found</li> </ul>             | <p>2</p> |

|                                                                 |                                                                                                                                                                     |                                                                                                                                   |                                                                                                                                 |                                                                                                                                                                        |                                                                               |                                                                                |                                                                                                    |          |
|-----------------------------------------------------------------|---------------------------------------------------------------------------------------------------------------------------------------------------------------------|-----------------------------------------------------------------------------------------------------------------------------------|---------------------------------------------------------------------------------------------------------------------------------|------------------------------------------------------------------------------------------------------------------------------------------------------------------------|-------------------------------------------------------------------------------|--------------------------------------------------------------------------------|----------------------------------------------------------------------------------------------------|----------|
| <p>He 2019<sup>34</sup><br/>(Cross-sectional)</p>               | <ul style="list-style-type: none"> <li>· National</li> <li>· (1988-Dec 2011)</li> </ul>                                                                             | <ul style="list-style-type: none"> <li>· Nonsmoking adults ≥18 years</li> <li>· Diagnosis: HF</li> <li>· Sample: N=572</li> </ul> | <ul style="list-style-type: none"> <li>· NHANES III Public-Use Mortality Linked File</li> <li>· National Death Index</li> </ul> | <ul style="list-style-type: none"> <li>· Age</li> <li>· SexSex</li> <li>· Race</li> <li>· Region</li> <li>· Urban/Rural</li> <li>· Education</li> <li>· HHI</li> </ul> | <ul style="list-style-type: none"> <li>· Secondhand smoke exposure</li> </ul> | <ul style="list-style-type: none"> <li>· All-cause Mortality</li> </ul>        | <ul style="list-style-type: none"> <li>· Exposure: higher risk (HR 1.4, CI 1.07–1.84)</li> </ul>   | <p>4</p> |
| <p>Kaiser 2020<sup>39</sup><br/>(Prospective Observational)</p> | <ul style="list-style-type: none"> <li>· Forsyth County, NC; Sacramento County, CA; Washington County, MD; and Pittsburgh, PA</li> <li>· (1989-Jun 2015)</li> </ul> | <ul style="list-style-type: none"> <li>· Medicare eligible adults ≥65 years</li> <li>· Sample: N=529</li> </ul>                   | <ul style="list-style-type: none"> <li>· Cardio-vascular Health Study</li> <li>· Medicare claims</li> <li>· EMR</li> </ul>      | <ul style="list-style-type: none"> <li>· Age</li> <li>· SexSex</li> <li>· Race</li> <li>· Marital Status</li> <li>· Disability</li> </ul>                              | <ul style="list-style-type: none"> <li>· Social Support</li> </ul>            | <ul style="list-style-type: none"> <li>· Survival after incident HF</li> </ul> | <ul style="list-style-type: none"> <li>· No statistically significant association found</li> </ul> | <p>2</p> |

|                                                                   |                                                                                                                                             |                                                                                                                                                              |                                                                                                                                 |                                                                                                      |                                                                                                                                                       |                                                                            |                                                                                                                                                                                                                                                                                                                                                                                                                                       |          |
|-------------------------------------------------------------------|---------------------------------------------------------------------------------------------------------------------------------------------|--------------------------------------------------------------------------------------------------------------------------------------------------------------|---------------------------------------------------------------------------------------------------------------------------------|------------------------------------------------------------------------------------------------------|-------------------------------------------------------------------------------------------------------------------------------------------------------|----------------------------------------------------------------------------|---------------------------------------------------------------------------------------------------------------------------------------------------------------------------------------------------------------------------------------------------------------------------------------------------------------------------------------------------------------------------------------------------------------------------------------|----------|
| <p>Eapen 2015<sup>27*</sup><br/>(Retrospective Observational)</p> | <ul style="list-style-type: none"> <li>US hospitals, including community and large tertiary centers</li> <li>(Jan 2005-Dec 2011)</li> </ul> | <ul style="list-style-type: none"> <li>Population: FFS CMS beneficiaries ≥65 years old</li> <li>Principal Diagnosis: HF</li> <li>Sample: N=48,338</li> </ul> | <ul style="list-style-type: none"> <li>GWTG HF Registry</li> <li>CMS claims data</li> <li>County-level SES AHRF data</li> </ul> | <ul style="list-style-type: none"> <li>Age</li> <li>SexSex</li> <li>Urban/rural residence</li> </ul> | <ul style="list-style-type: none"> <li>Race and Ethnicity</li> <li>Education</li> <li>Employment</li> <li>Income</li> <li>County level SES</li> </ul> | <ul style="list-style-type: none"> <li>All-cause Mortality, 30d</li> </ul> | <ul style="list-style-type: none"> <li>HISP and Black: lower odds (HISP: OR 0.70, CI 0.58 - 0.83) (Black: OR 0.57, CI: 0.50–0.65)</li> <li>Education: no statistically significant association found</li> <li>Employment no statistically significant association found</li> <li>HHI: reduces with unit increases in HHI (OR 0.97, CI 0.95-1.00)</li> <li>County level SES: no statistically significant association found</li> </ul> | <p>3</p> |
|-------------------------------------------------------------------|---------------------------------------------------------------------------------------------------------------------------------------------|--------------------------------------------------------------------------------------------------------------------------------------------------------------|---------------------------------------------------------------------------------------------------------------------------------|------------------------------------------------------------------------------------------------------|-------------------------------------------------------------------------------------------------------------------------------------------------------|----------------------------------------------------------------------------|---------------------------------------------------------------------------------------------------------------------------------------------------------------------------------------------------------------------------------------------------------------------------------------------------------------------------------------------------------------------------------------------------------------------------------------|----------|



|                                                                    |                                                                                                                         |                                                                                                                                                                                                                                    |                                                                                  |                                                                                       |                                                                                       |                                                                            |                                                                                                                                                                                          |          |
|--------------------------------------------------------------------|-------------------------------------------------------------------------------------------------------------------------|------------------------------------------------------------------------------------------------------------------------------------------------------------------------------------------------------------------------------------|----------------------------------------------------------------------------------|---------------------------------------------------------------------------------------|---------------------------------------------------------------------------------------|----------------------------------------------------------------------------|------------------------------------------------------------------------------------------------------------------------------------------------------------------------------------------|----------|
| <p>Eberly 2019<sup>28*</sup><br/>(Retrospective Observational)</p> | <ul style="list-style-type: none"> <li>Brigham and Women's Hospital, Boston, MA</li> <li>(Sep 2008-Nov 2017)</li> </ul> | <ul style="list-style-type: none"> <li>Population: Black, White, Latinx patients admitted to general medicine or cardiology from ED <math>\geq</math>18 years</li> <li>Principal Diagnosis: HF</li> <li>Sample: N=1,967</li> </ul> | <ul style="list-style-type: none"> <li>EMR</li> <li>MA Death Registry</li> </ul> | <ul style="list-style-type: none"> <li>None</li> </ul>                                | <ul style="list-style-type: none"> <li>Race and Ethnicity</li> </ul>                  | <ul style="list-style-type: none"> <li>All-cause Mortality, 30d</li> </ul> | <ul style="list-style-type: none"> <li>Black Race: lower risk (HR, 0.52, CI: 0.30-0.91)</li> <li>Latinx (GM admission): no statistically significant association found</li> </ul>        | <p>3</p> |
| <p>Patel 2020<sup>52*</sup><br/>(Retrospective Observational)</p>  | <ul style="list-style-type: none"> <li>Emory Health Care system, Atlanta, GA</li> <li>(2010-2018)</li> </ul>            | <ul style="list-style-type: none"> <li>Population: Admitted Black or White patients <math>\geq</math>18 years</li> <li>Diagnosis (primary or secondary): acute HF</li> <li>Sample: N=30,630</li> </ul>                             | <ul style="list-style-type: none"> <li>EMR</li> </ul>                            | <ul style="list-style-type: none"> <li>Age</li> <li>Sex</li> <li>Insurance</li> </ul> | <ul style="list-style-type: none"> <li>Race</li> <li>Neighborhood SES (EM)</li> </ul> | <ul style="list-style-type: none"> <li>All-cause Mortality, 30d</li> </ul> | <ul style="list-style-type: none"> <li>Black patients: higher risk (RR: 1.17, CI 1.10-1.25).</li> <li>Lower neighborhood SES: no effect modification found for Black patients</li> </ul> | <p>3</p> |

|                                                                   |                                                                                                                    |                                                                                                                                                                                                        |                                                                                                                                                                                                  |                                                                                    |                                                                                                                                                                                                                        |                                                                            |                                                                                                                                                     |   |
|-------------------------------------------------------------------|--------------------------------------------------------------------------------------------------------------------|--------------------------------------------------------------------------------------------------------------------------------------------------------------------------------------------------------|--------------------------------------------------------------------------------------------------------------------------------------------------------------------------------------------------|------------------------------------------------------------------------------------|------------------------------------------------------------------------------------------------------------------------------------------------------------------------------------------------------------------------|----------------------------------------------------------------------------|-----------------------------------------------------------------------------------------------------------------------------------------------------|---|
| <p>Trivedi 2020<sup>62</sup><br/>(Cross-sectional)</p>            | <ul style="list-style-type: none"> <li>National: Veteran's Affairs Medical Centers</li> <li>(2012-2014)</li> </ul> | <ul style="list-style-type: none"> <li>Hospitalized Veterans ≥66 years</li> <li>Diagnosis: HF</li> <li>Sample: N=42,892</li> </ul>                                                                     | <ul style="list-style-type: none"> <li>VA health system's Corporate Data Warehouse</li> <li>CMS Medicare Master Beneficiary Summary File</li> <li>Minimum Data Set</li> <li>US Census</li> </ul> | <ul style="list-style-type: none"> <li>Age</li> <li>Sex</li> </ul>                 | <ul style="list-style-type: none"> <li>Neighborhood Disadvantage</li> <li>Race and Ethnicity</li> <li>Living Status</li> <li>Urban/Rural</li> <li>Reason for Medicare Eligibility</li> <li>Insurance Status</li> </ul> | <ul style="list-style-type: none"> <li>All-Cause Mortality, 30d</li> </ul> | <ul style="list-style-type: none"> <li>No statistically significant associations found</li> </ul>                                                   |   |
| <p>Sterling 2020<sup>59</sup><br/>(Prospective Observational)</p> | <ul style="list-style-type: none"> <li>48 US states and DC</li> <li>(2003-2014)</li> </ul>                         | <ul style="list-style-type: none"> <li>Population: REGARDS study participants who were Medicare Part A beneficiaries ≥65 years and discharged</li> <li>Diagnosis: HF</li> <li>Sample: N=598</li> </ul> | <ul style="list-style-type: none"> <li>REGARDS study</li> <li>EMR</li> <li>American Hospital Association annual survey</li> <li>Medicare's Hospital Compare</li> </ul>                           | <ul style="list-style-type: none"> <li>Age</li> <li>Sex</li> <li>Region</li> </ul> | <ul style="list-style-type: none"> <li>Race and Ethnicity</li> <li>Education</li> <li>Income</li> <li>Neighborhood SES</li> <li>Social Support</li> <li>Urban/rural residence</li> </ul>                               | <ul style="list-style-type: none"> <li>All-cause Mortality, 90d</li> </ul> | <ul style="list-style-type: none"> <li>1 SDOH: higher risk (HR 2.78, CI 1.37-5.62)</li> <li>≥2 SDOH: higher risk (HR 2.57, CI 1.19-5.54)</li> </ul> | 2 |

|                                                                      |                                                                                                                            |                                                                                                                                                       |                                                                                             |                                                                                                                                           |                                                                                                                                    |                                                                                                 |                                                                                                                                                                                                                                                                                                                  |          |
|----------------------------------------------------------------------|----------------------------------------------------------------------------------------------------------------------------|-------------------------------------------------------------------------------------------------------------------------------------------------------|---------------------------------------------------------------------------------------------|-------------------------------------------------------------------------------------------------------------------------------------------|------------------------------------------------------------------------------------------------------------------------------------|-------------------------------------------------------------------------------------------------|------------------------------------------------------------------------------------------------------------------------------------------------------------------------------------------------------------------------------------------------------------------------------------------------------------------|----------|
| <p>Knighton 2018<sup>40*</sup><br/>(Retrospective Observational)</p> | <ul style="list-style-type: none"> <li>Intermountain Healthcare System in Utah</li> <li>(2010 and 2014)</li> </ul>         | <ul style="list-style-type: none"> <li>Population: Inpatient aged ≥18 years</li> <li>Diagnosis: HF</li> <li>Sample: N=4,737</li> </ul>                | <ul style="list-style-type: none"> <li>EMR</li> <li>State death certificate data</li> </ul> | <ul style="list-style-type: none"> <li>Age</li> <li>Sex</li> <li>Race and Ethnicity</li> <li>Marital status</li> <li>Insurance</li> </ul> | <ul style="list-style-type: none"> <li>Neighborhood deprivation</li> <li>Faith (EM)</li> <li>Urban/rural residence (EM)</li> </ul> | <ul style="list-style-type: none"> <li>All-cause Mortality: 30d, 90d, 180d, and 365d</li> </ul> | <p>Deprived areas and faith/ spirituality:</p> <ul style="list-style-type: none"> <li>30d lower odds (OR 0.35, CI 0.12–0.98)</li> <li>90d, lower odds (OR 0.49, CI 0.30-0.90)</li> <li>180 d, lower odds: (OR 0.52, CI 0.35-0.76)</li> <li>365d: no statistically significant association found</li> </ul>       | <p>3</p> |
| <p>Lu 2016<sup>43*</sup><br/>(Retrospective Observational)</p>       | <ul style="list-style-type: none"> <li>Einstein Medical Center, Philadelphia, PA</li> <li>(Jan 2011 – Feb 2013)</li> </ul> | <ul style="list-style-type: none"> <li>Population: AA patient admissions aged &gt;20 years</li> <li>Diagnosis: ADHF</li> <li>Sample: N=611</li> </ul> | <ul style="list-style-type: none"> <li>EMR</li> <li>SSDI</li> </ul>                         | <ul style="list-style-type: none"> <li>Age</li> <li>Sex</li> </ul>                                                                        | <ul style="list-style-type: none"> <li>Marital status</li> <li>Living status</li> </ul>                                            | <ul style="list-style-type: none"> <li>All-cause Mortality, 30d, 90d, 1y</li> </ul>             | <ul style="list-style-type: none"> <li>30d, Married: no statistically significant association found</li> <li>1y, Married: lower odds (OR 0.50, CI 0.31 - 0.90)</li> <li>30d, Living alone: higher odds (OR 2.86, 1.59-5.14)</li> <li>1y, Living alone: no statistically significant association found</li> </ul> | <p>3</p> |

|                                                                   |                                                                                                                                                                |                                                                                                                                                                               |                                                                                                            |                                                                                                       |                                                                                                           |                                                                                                 |                                                                                                                                                                                                                                                                                                     |          |
|-------------------------------------------------------------------|----------------------------------------------------------------------------------------------------------------------------------------------------------------|-------------------------------------------------------------------------------------------------------------------------------------------------------------------------------|------------------------------------------------------------------------------------------------------------|-------------------------------------------------------------------------------------------------------|-----------------------------------------------------------------------------------------------------------|-------------------------------------------------------------------------------------------------|-----------------------------------------------------------------------------------------------------------------------------------------------------------------------------------------------------------------------------------------------------------------------------------------------------|----------|
| <p>Selim 2015<sup>57*</sup><br/>(Retrospective Observational)</p> | <ul style="list-style-type: none"> <li>3 hospitals within the Montefiore Medical Center health system in the Bronx, NY</li> <li>(Jan 2001-Dec 2010)</li> </ul> | <ul style="list-style-type: none"> <li>Population: Hospitalized low SES patients aged <math>\geq 18</math> years</li> <li>Diagnosis: ADHF</li> <li>Sample: N=7,516</li> </ul> | <ul style="list-style-type: none"> <li>EMR</li> <li>Social Security Death Registry</li> </ul>              | <ul style="list-style-type: none"> <li>Age</li> <li>Sex</li> </ul>                                    | <ul style="list-style-type: none"> <li>Access to Cardiologist</li> <li>Race and Ethnicity (EM)</li> </ul> | <ul style="list-style-type: none"> <li>All-cause Mortality, 30d, 60d</li> </ul>                 | <ul style="list-style-type: none"> <li>Access to cardiology 30d: no statistically significant association found</li> <li>Access to Cardiology services (60d): lower risk (HR: 0.70, CI 0.52-0.96)</li> <li>Race and Ethnicity (30d, 60d): no statistically significant association found</li> </ul> | <p>3</p> |
| <p>Vivo 2014<sup>63*</sup><br/>(Prospective Observational)</p>    | <ul style="list-style-type: none"> <li>213 hospitals participating in GWTG-HF</li> <li>(Jan 2005-Dec 2011)</li> </ul>                                          | <ul style="list-style-type: none"> <li>Population: Medicare FFS patients <math>\geq 65</math> years</li> <li>Principal Diagnosis: HF</li> <li>Sample: N=47,149</li> </ul>     | <ul style="list-style-type: none"> <li>GWTG-HF registry</li> <li>Medicare inpatient claims data</li> </ul> | <ul style="list-style-type: none"> <li>Age</li> <li>Sex</li> <li>Income</li> <li>Education</li> </ul> | <ul style="list-style-type: none"> <li>Race and Ethnicity</li> </ul>                                      | <ul style="list-style-type: none"> <li>All-cause Mortality (post discharge), 30d, 1y</li> </ul> | <ul style="list-style-type: none"> <li>Black, HISP, /Asian (30d): no statistically significant association found</li> <li>Black (1y): reduced risk (HR 0.93, CI 0.87-1.00)</li> <li>HISP, Asian (1y): no statistically significant association found</li> </ul>                                     | <p>2</p> |

|                                                              |                                                                                                                                       |                                                                                                                                                                             |                                                                    |                                                                                                                   |                                                                      |                                                                         |                                                                                                                      |   |
|--------------------------------------------------------------|---------------------------------------------------------------------------------------------------------------------------------------|-----------------------------------------------------------------------------------------------------------------------------------------------------------------------------|--------------------------------------------------------------------|-------------------------------------------------------------------------------------------------------------------|----------------------------------------------------------------------|-------------------------------------------------------------------------|----------------------------------------------------------------------------------------------------------------------|---|
| Wadhera 2018 <sup>64*</sup><br>(Retrospective Observational) | <ul style="list-style-type: none"> <li>391 GWTG registry sites across 40 states</li> <li>(Jan 2010-Jun 2017)</li> </ul>               | <ul style="list-style-type: none"> <li>Population: Low-income patients &lt;65 years, not eligible for Medicare</li> <li>Diagnosis: HFH</li> <li>Sample: N=58,804</li> </ul> | <ul style="list-style-type: none"> <li>GWTG HF Registry</li> </ul> | <ul style="list-style-type: none"> <li>Age</li> <li>Sex</li> <li>Race and Ethnicity</li> </ul>                    | <ul style="list-style-type: none"> <li>Medicaid Expansion</li> </ul> | <ul style="list-style-type: none"> <li>In-Hospital Mortality</li> </ul> | <ul style="list-style-type: none"> <li>Medicaid expansion: no statistically significant association found</li> </ul> | 3 |
| Watkins 2013 <sup>65*</sup><br>(Retrospective Observational) | <ul style="list-style-type: none"> <li>Northwestern Louisiana tertiary care teaching hospital</li> <li>(Jun 2003-Dec 2008)</li> </ul> | <ul style="list-style-type: none"> <li>Population: Patients admitted ≥18 years</li> <li>Diagnosis: HF</li> <li>Sample: N=357</li> </ul>                                     | <ul style="list-style-type: none"> <li>EMR</li> </ul>              | <ul style="list-style-type: none"> <li>Age</li> <li>Sex</li> <li>Race and Ethnicity</li> <li>Insurance</li> </ul> | <ul style="list-style-type: none"> <li>Marital Status</li> </ul>     | <ul style="list-style-type: none"> <li>In-Hospital Mortality</li> </ul> | <ul style="list-style-type: none"> <li>No statistically significant association found</li> </ul>                     | 3 |

|                                                                      |                                                                                                                                                               |                                                                                                                                                                      |                                                                                 |                                                                                        |                                                                                                |                                                                                 |                                                                                                                                                                                                                                                                               |   |
|----------------------------------------------------------------------|---------------------------------------------------------------------------------------------------------------------------------------------------------------|----------------------------------------------------------------------------------------------------------------------------------------------------------------------|---------------------------------------------------------------------------------|----------------------------------------------------------------------------------------|------------------------------------------------------------------------------------------------|---------------------------------------------------------------------------------|-------------------------------------------------------------------------------------------------------------------------------------------------------------------------------------------------------------------------------------------------------------------------------|---|
| Yandrapalli 2019 <sup>70*</sup><br><br>(Retrospective Observational) | <ul style="list-style-type: none"> <li>Acute care hospitals</li> <li>(2005 – 2014)</li> </ul>                                                                 | <ul style="list-style-type: none"> <li>Population: Patients ≥18 years without concomitant ACS</li> <li>Diagnosis: HFH</li> <li>Sample: N=8,333,752</li> </ul>        | <ul style="list-style-type: none"> <li>HCUP NIS</li> </ul>                      | <ul style="list-style-type: none"> <li>None</li> </ul>                                 | <ul style="list-style-type: none"> <li>Age</li> <li>Sex</li> <li>Race and Ethnicity</li> </ul> | <ul style="list-style-type: none"> <li>In-hospital Mortality</li> </ul>         | <ul style="list-style-type: none"> <li>Age: older had higher rates (≥80 years (41.4); 65-79 (29.2); 45-64 (20.6); 18-44 (17.7)</li> <li>Females: higher (30.6 v. 25.4, p&lt;0.001)</li> <li>Race: White had highest rates (White (28.8); HISP (25.8); Black (22.3)</li> </ul> | 3 |
| Readmission <sup>§</sup>                                             |                                                                                                                                                               |                                                                                                                                                                      |                                                                                 |                                                                                        |                                                                                                |                                                                                 |                                                                                                                                                                                                                                                                               |   |
| DeFilippis 2020 <sup>21</sup><br><br>(Retrospective Observational)   | <ul style="list-style-type: none"> <li>INTERMACS registry</li> <li>(2008-2017)</li> </ul>                                                                     | <ul style="list-style-type: none"> <li>Population: Patients ≥18 years with continuous flow LVAD</li> <li>Sample: N=15,403</li> </ul>                                 | <ul style="list-style-type: none"> <li>INTERMACS</li> </ul>                     | <ul style="list-style-type: none"> <li>None</li> </ul>                                 | <ul style="list-style-type: none"> <li>PS Risks</li> </ul>                                     | <ul style="list-style-type: none"> <li>Time to All-cause Readmission</li> </ul> | <ul style="list-style-type: none"> <li>Any PS risk: higher risk (HR 1.14, CI 1.08-1.19)</li> </ul>                                                                                                                                                                            | 3 |
| Foraker 2011 <sup>32*</sup><br><br>(Prospective Observational)       | <ul style="list-style-type: none"> <li>Forsyth County, NC; Washington County, MD; suburbs of Minneapolis, MN; and Jackson, MS</li> <li>(1987-2004)</li> </ul> | <ul style="list-style-type: none"> <li>Population: White and Black ARIC participants aged 45-64</li> <li>Diagnosis: incident HFH</li> <li>Sample: N=1,342</li> </ul> | <ul style="list-style-type: none"> <li>ARIC study</li> <li>US Census</li> </ul> | <ul style="list-style-type: none"> <li>Sex</li> <li>Race</li> <li>Education</li> </ul> | <ul style="list-style-type: none"> <li>Insurance</li> <li>Neighborhood SES</li> </ul>          | <ul style="list-style-type: none"> <li>Time to All-cause Readmission</li> </ul> | <ul style="list-style-type: none"> <li>Medicaid recipients: higher risk (HR 1.19, CI 1.05–1.36)</li> <li>Lower neighborhood HHI: higher risk (HR 1.40, CI 1.10–1.77)</li> </ul>                                                                                               | 2 |

|                                                                 |                                                                                                                                        |                                                                                                                                                                  |                                                                                                     |                                                                                                               |                                                                                                                                                                     |                                                                                 |                                                                                                                                                                                                                                                                                  |   |
|-----------------------------------------------------------------|----------------------------------------------------------------------------------------------------------------------------------------|------------------------------------------------------------------------------------------------------------------------------------------------------------------|-----------------------------------------------------------------------------------------------------|---------------------------------------------------------------------------------------------------------------|---------------------------------------------------------------------------------------------------------------------------------------------------------------------|---------------------------------------------------------------------------------|----------------------------------------------------------------------------------------------------------------------------------------------------------------------------------------------------------------------------------------------------------------------------------|---|
| McNaughton 2015 <sup>46*</sup><br>(Retrospective Observational) | <ul style="list-style-type: none"> <li>Quaternary care hospital</li> <li>(Nov 2010 – Jun 2013)</li> </ul>                              | <ul style="list-style-type: none"> <li>Population: Patients discharged from an acute HFH</li> <li>Sample: N=2,132</li> </ul>                                     | <ul style="list-style-type: none"> <li>Health Literacy Screening study data</li> <li>EMR</li> </ul> | <ul style="list-style-type: none"> <li>Insurance</li> <li>Age</li> <li>Sex</li> <li>Race</li> </ul>           | <ul style="list-style-type: none"> <li>Education/health literacy</li> </ul>                                                                                         | <ul style="list-style-type: none"> <li>Time to All-cause Readmission</li> </ul> | <ul style="list-style-type: none"> <li>Low health literacy: higher risk: (aHR 1.32, CI 1.05-1.66, P=0.02)</li> </ul>                                                                                                                                                             | 3 |
| Watkins 2013 <sup>65*</sup><br>(Retrospective Observational)    | <ul style="list-style-type: none"> <li>Northwestern Louisiana tertiary care teaching hospital</li> <li>(Jun 2003- Dec 2008)</li> </ul> | <ul style="list-style-type: none"> <li>Population: Patients admitted</li> <li>Diagnosis: HF</li> <li>Sample: N=357</li> </ul>                                    | <ul style="list-style-type: none"> <li>EMR</li> </ul>                                               | <ul style="list-style-type: none"> <li>Age</li> <li>Sex</li> <li>Race Ethnicity</li> <li>Insurance</li> </ul> | <ul style="list-style-type: none"> <li>Marital Status</li> </ul>                                                                                                    | <ul style="list-style-type: none"> <li>Time to All-cause Readmission</li> </ul> | <ul style="list-style-type: none"> <li>No statistically significant association found</li> </ul>                                                                                                                                                                                 | 3 |
| Ahmed 2018 <sup>13*</sup><br>(Retrospective Observational)      | <ul style="list-style-type: none"> <li>University of Florida</li> <li>(Jan 2008- Dec 2015)</li> </ul>                                  | <ul style="list-style-type: none"> <li>Population: Patients ≥18 years with LVAD implant, PS assessment, 1 year or more post-op</li> <li>Sample: N=111</li> </ul> | <ul style="list-style-type: none"> <li>EMR</li> </ul>                                               | <ul style="list-style-type: none"> <li>Age</li> <li>Sex</li> <li>Race</li> </ul>                              | <ul style="list-style-type: none"> <li>Insurance</li> <li>Education</li> <li>Income</li> <li>Marital status</li> <li>Urban/ rural residence</li> </ul>              | <ul style="list-style-type: none"> <li>All-cause Readmission, 30d</li> </ul>    | <ul style="list-style-type: none"> <li>No statistically significant associations found</li> </ul>                                                                                                                                                                                | 3 |
| Amarasingham 2010 <sup>15</sup><br>(Prospective Observational)  | <ul style="list-style-type: none"> <li>Parkland Memorial Hospital, Dallas, TX</li> <li>(Jan 2007 - Aug 2008)</li> </ul>                | <ul style="list-style-type: none"> <li>Population: Patients ≥18 discharged</li> <li>Principal Diagnosis: HF</li> <li>Sample: N=1,372</li> </ul>                  | <ul style="list-style-type: none"> <li>EMR</li> </ul>                                               | <ul style="list-style-type: none"> <li>None</li> </ul>                                                        | <ul style="list-style-type: none"> <li>Age</li> <li>Sex</li> <li>Race and Ethnicity</li> <li>Marital Status</li> <li>Insurance</li> <li>Neighborhood SES</li> </ul> | <ul style="list-style-type: none"> <li>All-cause Readmission, 30d</li> </ul>    | <ul style="list-style-type: none"> <li>Age: No statistically significant association found</li> <li>Male sex: higher odds (OR 1.37, CI 1.02 - 1.84)</li> <li>Race: Black race higher odds OR 1.47, CI 1.03-2.08); HISP no statistically significant association found</li> </ul> | 2 |

|                                                            |                                                                                                  |                                                                                                                                                        |        |        |                                                                                                                                             |                              |                                                                                                                                                                                                                                                                                                                                                                                                                                                 |   |
|------------------------------------------------------------|--------------------------------------------------------------------------------------------------|--------------------------------------------------------------------------------------------------------------------------------------------------------|--------|--------|---------------------------------------------------------------------------------------------------------------------------------------------|------------------------------|-------------------------------------------------------------------------------------------------------------------------------------------------------------------------------------------------------------------------------------------------------------------------------------------------------------------------------------------------------------------------------------------------------------------------------------------------|---|
|                                                            |                                                                                                  |                                                                                                                                                        |        |        | <ul style="list-style-type: none"> <li>• Social Instability</li> </ul>                                                                      |                              | <ul style="list-style-type: none"> <li>• Single: higher odds (OR 1.47, CI 1.08 - 2.01)</li> <li>• Medicare insurance: higher odds (OR 1.59, CI 1.17 - 2.17).</li> <li>• Lowest neighborhood SES: higher odds (OR 1.30, CI 0.98 - 1.74)</li> <li>• Social instability: higher odds (OR 1.13, CI 1.07 - 1.19)</li> </ul>                                                                                                                          |   |
| DeLia 2014 <sup>22*</sup><br>(Retrospective Observational) | <ul style="list-style-type: none"> <li>• Hospitals and clinics</li> <li>• (2007-2010)</li> </ul> | <ul style="list-style-type: none"> <li>• Population: Medicare enrollees ≥65 years</li> <li>• Diagnosis: ≥1 HFH</li> <li>• Sample: N=233,641</li> </ul> | • MPCD | • None | <ul style="list-style-type: none"> <li>• Age</li> <li>• Sex</li> <li>• Race and Ethnicity</li> <li>• Insurance</li> <li>• Region</li> </ul> | • All-cause Readmission, 30d | <ul style="list-style-type: none"> <li>• Older age statistically significant association with higher risk (HR NR)</li> <li>• Sex: no statistically significant association found</li> <li>• Black and HISP associated with higher risk</li> <li>• Medicare Advantage: statistically significant association with higher risk (HR NR)</li> <li>• Northeast and Midwest: statistically significant association with lower risk (HR NR)</li> </ul> | 3 |



|                                                              |                                                                                                                                             |                                                                                                                                                                                    |                                                                                                                                                                  |                                                                                                   |                                                                                                                                                                |                                                                              |                                                                                                                                                                                                                                                                                                                                                                                                                                  |   |
|--------------------------------------------------------------|---------------------------------------------------------------------------------------------------------------------------------------------|------------------------------------------------------------------------------------------------------------------------------------------------------------------------------------|------------------------------------------------------------------------------------------------------------------------------------------------------------------|---------------------------------------------------------------------------------------------------|----------------------------------------------------------------------------------------------------------------------------------------------------------------|------------------------------------------------------------------------------|----------------------------------------------------------------------------------------------------------------------------------------------------------------------------------------------------------------------------------------------------------------------------------------------------------------------------------------------------------------------------------------------------------------------------------|---|
| Di Palo 2017 <sup>24*</sup><br>(Intervention)                | <ul style="list-style-type: none"> <li>Montefiore Medical Center, Bronx, NY</li> <li>(Jun 2015-Dec 2015)</li> </ul>                         | <ul style="list-style-type: none"> <li>Population: Inpatients</li> <li>Diagnosis: HF</li> <li>Sample: N=94</li> </ul>                                                              | <ul style="list-style-type: none"> <li>EMR</li> <li>Intake assessment</li> </ul>                                                                                 | <ul style="list-style-type: none"> <li>Age</li> <li>Sex</li> </ul>                                | <ul style="list-style-type: none"> <li>Social support (NT program)</li> </ul>                                                                                  | <ul style="list-style-type: none"> <li>All-cause Readmission, 30d</li> </ul> | <ul style="list-style-type: none"> <li>Intervention group: 17.6%</li> <li>Control group: 25.6%</li> </ul>                                                                                                                                                                                                                                                                                                                        | 2 |
| Downing 2018 <sup>26*</sup><br>(Retrospective Observational) | <ul style="list-style-type: none"> <li>US non-federal acute care hospitals</li> <li>(Jan 2009-Dec 2011)</li> </ul>                          | <ul style="list-style-type: none"> <li>Population: Hospitals with Medicare FFS beneficiaries ≥65 years</li> <li>Principal Diagnosis: AMI or HF</li> <li>Sample: N=1,265</li> </ul> | <ul style="list-style-type: none"> <li>Medicare Standard Analytic Files</li> <li>Medicare Enrollment Database</li> <li>2011 American Community Survey</li> </ul> | <ul style="list-style-type: none"> <li>Age</li> <li>Sex</li> </ul>                                | <ul style="list-style-type: none"> <li>Race and Ethnicity</li> <li>Income/wealth</li> </ul>                                                                    | <ul style="list-style-type: none"> <li>All-cause Readmission, 30d</li> </ul> | <ul style="list-style-type: none"> <li>Black patients: higher risk (HF- RSRR: 2.8%; P &lt; .001)</li> <li>Low-income neighborhood: No statistically significant association found</li> </ul>                                                                                                                                                                                                                                     | 3 |
| Eapen 2015 <sup>27*</sup><br>(Retrospective Observational)   | <ul style="list-style-type: none"> <li>US hospitals, including community and large tertiary centers</li> <li>(Jan 2005-Dec 2011)</li> </ul> | <ul style="list-style-type: none"> <li>Population: FFS CMS beneficiaries ≥65 years old</li> <li>Principal Diagnosis: HF</li> <li>Sample: N=48,338</li> </ul>                       | <ul style="list-style-type: none"> <li>GWTG HF Registry</li> <li>CMS claims data</li> <li>County-level SES AHRF data</li> </ul>                                  | <ul style="list-style-type: none"> <li>Age</li> <li>Sex</li> <li>Urban/Rural residence</li> </ul> | <ul style="list-style-type: none"> <li>Race and Ethnicity</li> <li>Education</li> <li>Employment</li> <li>Income/wealth</li> <li>SES (County level)</li> </ul> | <ul style="list-style-type: none"> <li>All-cause Readmission, 30d</li> </ul> | <ul style="list-style-type: none"> <li>Race: Black race higher odds (OR 1.10, CI 1.01-1.19); HISP higher odds (OR 1.14, CI 1.02-1.28)</li> <li>≥ High school diploma: lower odds (OR 0.95, CI 0.91–0.99)</li> <li>White-collar workers: higher odds (OR 1.06, CI 1.01-1.11)</li> <li>Income: No statistically significant association found</li> <li>County-level SES: No statistically significant association found</li> </ul> | 3 |

|                                                                         |                                                                                                                     |                                                                                                                                                                                                          |                                                                                                                                                                                                                                                           |                                                                                                                        |                                                                                                                                                        |                                                                                         |                                                                                                                                                                                                                                                                                                |          |
|-------------------------------------------------------------------------|---------------------------------------------------------------------------------------------------------------------|----------------------------------------------------------------------------------------------------------------------------------------------------------------------------------------------------------|-----------------------------------------------------------------------------------------------------------------------------------------------------------------------------------------------------------------------------------------------------------|------------------------------------------------------------------------------------------------------------------------|--------------------------------------------------------------------------------------------------------------------------------------------------------|-----------------------------------------------------------------------------------------|------------------------------------------------------------------------------------------------------------------------------------------------------------------------------------------------------------------------------------------------------------------------------------------------|----------|
| <p>Gilotra 2017<sup>33</sup><br/>(Prospective Observational)</p>        | <ul style="list-style-type: none"> <li>Urban: academic center</li> <li>(Jul 2014-2015)</li> </ul>                   | <ul style="list-style-type: none"> <li>Admitted patients <math>\geq 18</math> years requiring intravenous diuretics</li> <li>Principal Diagnosis: decompensated HF</li> <li>Sample: N=94</li> </ul>      | <ul style="list-style-type: none"> <li>EMR</li> <li>Patient survey</li> </ul>                                                                                                                                                                             | <ul style="list-style-type: none"> <li>Age</li> <li>Sex</li> <li>Race</li> <li>Education Level</li> </ul>              | <ul style="list-style-type: none"> <li>Health Literacy</li> </ul>                                                                                      | <ul style="list-style-type: none"> <li>All-cause Readmission, 30d</li> </ul>            | <ul style="list-style-type: none"> <li>Health literate: Lower odds (OR 0.31, CI 0.10–0.91).</li> </ul>                                                                                                                                                                                         | <p>2</p> |
| <p>Joynt Maddox 2019<sup>38</sup><br/>(Retrospective Observational)</p> | <ul style="list-style-type: none"> <li>Inpatient and OP care</li> <li>(Dec 2012 – Nov 2015)</li> </ul>              | <ul style="list-style-type: none"> <li>Population: FFS Medicare beneficiary admissions <math>\geq 65</math> years old</li> <li>Diagnosis: AMI, CHF, or pneumonia</li> <li>Sample: CHF N=2,874</li> </ul> | <ul style="list-style-type: none"> <li>Medicare 100 percent Research Identifiable Files</li> <li>CMS Master Beneficiary Summary File</li> <li>CMS Vital Records File</li> <li>2017 Inpatient Prospective Payment System final rule impact file</li> </ul> | <ul style="list-style-type: none"> <li>Age</li> <li>Sex</li> <li>Race</li> </ul>                                       | <ul style="list-style-type: none"> <li>Housing instability</li> <li>Neighborhood SES</li> <li>Insurance</li> <li>Hospital Safety-Net Status</li> </ul> | <ul style="list-style-type: none"> <li>All-cause Readmission, 30d (CHF only)</li> </ul> | <ul style="list-style-type: none"> <li>Housing instability: (aOR 1.39, CI 1.29-1.49)</li> <li>Disadvantaged neighborhood: higher odds (aOR 1.03, CI 1.01-1.04)</li> <li>Medicaid: higher odds (aOR 1.22, CI 1.21-1.24)</li> <li>Safety-net hospitals: higher rate: (1.037 v. 0.997)</li> </ul> | <p>3</p> |
| <p>Knighton 2018<sup>40</sup><br/>(Retrospective Observational)</p>     | <ul style="list-style-type: none"> <li>Inter-mountain Healthcare System in Utah</li> <li>(2010 and 2014)</li> </ul> | <ul style="list-style-type: none"> <li>Population: inpatient. Age inclusion criteria NR</li> <li>Diagnosis: HF</li> <li>Sample: N=4,737</li> </ul>                                                       | <ul style="list-style-type: none"> <li>EMR</li> <li>State death certificate data</li> </ul>                                                                                                                                                               | <ul style="list-style-type: none"> <li>Age</li> <li>Sex</li> <li>Race and Ethnicity</li> <li>Marital Status</li> </ul> | <ul style="list-style-type: none"> <li>Neighborhood SES</li> <li>Faith/Spirituality</li> <li>Urban/Rural Residence</li> </ul>                          | <ul style="list-style-type: none"> <li>All-cause Readmission, 30d</li> </ul>            | <ul style="list-style-type: none"> <li>No statistically significant association found</li> </ul>                                                                                                                                                                                               | <p>3</p> |

|                                                              |                                                                                                                              |                                                                                                                                                        |                                                                                                |                                                                                   |                                                                                                                           |                                                                              |                                                                                                                                                                                                                                                                                                                                                                                        |   |
|--------------------------------------------------------------|------------------------------------------------------------------------------------------------------------------------------|--------------------------------------------------------------------------------------------------------------------------------------------------------|------------------------------------------------------------------------------------------------|-----------------------------------------------------------------------------------|---------------------------------------------------------------------------------------------------------------------------|------------------------------------------------------------------------------|----------------------------------------------------------------------------------------------------------------------------------------------------------------------------------------------------------------------------------------------------------------------------------------------------------------------------------------------------------------------------------------|---|
|                                                              |                                                                                                                              |                                                                                                                                                        |                                                                                                | <ul style="list-style-type: none"> <li>Insurance</li> </ul>                       |                                                                                                                           |                                                                              |                                                                                                                                                                                                                                                                                                                                                                                        |   |
| Lu 2016 <sup>43*</sup><br>(Retrospective Observational)      | <ul style="list-style-type: none"> <li>Einstein Medical Center, Philadelphia, PA</li> <li>(Jan 2011 – Feb 2013)</li> </ul>   | <ul style="list-style-type: none"> <li>Population: AA patient admissions aged &gt;20 years</li> <li>Diagnosis: ADHF</li> <li>Sample: N=611</li> </ul>  | <ul style="list-style-type: none"> <li>EMR</li> <li>SSDI</li> </ul>                            | <ul style="list-style-type: none"> <li>Age</li> <li>Sex</li> </ul>                | <ul style="list-style-type: none"> <li>Marital status</li> <li>Living status</li> </ul>                                   | <ul style="list-style-type: none"> <li>All-cause Readmission, 30d</li> </ul> | <ul style="list-style-type: none"> <li>Married: no statistically significant association found</li> <li>Living alone: higher odds (OR 2.86, CI 1.59-5.14)</li> </ul>                                                                                                                                                                                                                   | 3 |
| McKinley 2018 <sup>45</sup><br>(Intervention)                | <ul style="list-style-type: none"> <li>WellStar Atlanta Medical Center, Atlanta, GA</li> <li>(May 2012- Dec 2015)</li> </ul> | <ul style="list-style-type: none"> <li>Population: Admission of AA men</li> <li>Diagnosis: HF (primary or secondary)</li> <li>Sample: N=132</li> </ul> | <ul style="list-style-type: none"> <li>EMR</li> </ul>                                          | <ul style="list-style-type: none"> <li>Age</li> <li>Race and Ethnicity</li> </ul> | <ul style="list-style-type: none"> <li>HF intervention</li> </ul>                                                         | <ul style="list-style-type: none"> <li>All-cause Readmission, 30d</li> </ul> | <ul style="list-style-type: none"> <li>Intervention: statistically significant association with lower readmission rates</li> </ul>                                                                                                                                                                                                                                                     | 2 |
| Meddings 2017 <sup>47</sup><br>(Retrospective Observational) | <ul style="list-style-type: none"> <li>Hospitals</li> <li>(Jun 1996- Jun 2012)</li> </ul>                                    | <ul style="list-style-type: none"> <li>Population: Admission of Patients &gt; 50 years</li> <li>Diagnosis: HF</li> <li>Sample: N=2,068</li> </ul>      | <ul style="list-style-type: none"> <li>HRS-CMS data</li> <li>ACS-HCUP data (FL, WA)</li> </ul> | <ul style="list-style-type: none"> <li>Age</li> <li>Sex</li> </ul>                | <ul style="list-style-type: none"> <li>Race</li> <li>Social support</li> <li>Individual SES</li> <li>Insurance</li> </ul> | <ul style="list-style-type: none"> <li>All-cause Readmission, 30d</li> </ul> | <ul style="list-style-type: none"> <li>Black race: higher odds (OR 1.17, CI 1.06-1.29)</li> <li>Social support: Having children (social support): lower odds (OR = 0.66, CI 0.44-0.98); married/partnered no statistically significant association found</li> <li>Highest quartile of wealth: lower (OR = 0.53, CI = 0.35-0.79)</li> <li>Public insurance: no statistically</li> </ul> | 3 |

|                                                              |                                                                                                                                                     |                                                                                                                                                                           |                                                                                                                                                                 |                                                                                                                                                     |                                                                                                                                              |                                                                                |                                                                                                                                                                                                                                                                                |   |
|--------------------------------------------------------------|-----------------------------------------------------------------------------------------------------------------------------------------------------|---------------------------------------------------------------------------------------------------------------------------------------------------------------------------|-----------------------------------------------------------------------------------------------------------------------------------------------------------------|-----------------------------------------------------------------------------------------------------------------------------------------------------|----------------------------------------------------------------------------------------------------------------------------------------------|--------------------------------------------------------------------------------|--------------------------------------------------------------------------------------------------------------------------------------------------------------------------------------------------------------------------------------------------------------------------------|---|
|                                                              |                                                                                                                                                     |                                                                                                                                                                           |                                                                                                                                                                 |                                                                                                                                                     |                                                                                                                                              |                                                                                | significantly association found                                                                                                                                                                                                                                                |   |
| Mirkin 2017 <sup>49</sup><br>(Retrospective Observational)   | <ul style="list-style-type: none"> <li>· Pennsylvania hospitals</li> <li>· (2011-2012)</li> </ul>                                                   | <ul style="list-style-type: none"> <li>· Population: Discharged patients aged ≥18 years</li> <li>· Diagnosis: CHF</li> <li>· Sample: N=155,146</li> </ul>                 | <ul style="list-style-type: none"> <li>· State-wide multi-hospital data set</li> </ul>                                                                          | <ul style="list-style-type: none"> <li>· None</li> </ul>                                                                                            | <ul style="list-style-type: none"> <li>· Age</li> <li>· Sex</li> <li>· Race and Ethnicity</li> <li>· Insurance</li> </ul>                    | <ul style="list-style-type: none"> <li>· All-cause Readmission, 30d</li> </ul> | <ul style="list-style-type: none"> <li>· ≥65 years: lower odds (aOR 0.86-0.93)</li> <li>· Female: lower odds (aOR 0.94, CI 0.92-0.97)</li> <li>· Black: higher odds (aOR 1.16, CI 1.12-1.21)</li> <li>· Insurance: no statistically significantly association found</li> </ul> | 3 |
| Nagasako 2014 <sup>50</sup><br>(Prospective Observational)   | <ul style="list-style-type: none"> <li>· Non-federal acute care and critical-access hospitals in Missouri</li> <li>· (Jun 2009-May 2012)</li> </ul> | <ul style="list-style-type: none"> <li>· Population: Discharged Medicare FFS patients ≥65 years</li> <li>· Principal Diagnosis: HF</li> <li>· Sample: N=22,433</li> </ul> | <ul style="list-style-type: none"> <li>· Administrative hospital discharge data</li> <li>· Truven Health Analytics</li> <li>· Nielsen Pop-Facts data</li> </ul> | <ul style="list-style-type: none"> <li>· Age</li> <li>· Sex</li> <li>· Race</li> <li>· Income</li> <li>· Education</li> <li>· Employment</li> </ul> | <ul style="list-style-type: none"> <li>· Neighborhood SES</li> </ul>                                                                         | <ul style="list-style-type: none"> <li>· All-cause Readmission, 30d</li> </ul> | <ul style="list-style-type: none"> <li>· No statistically significant association found</li> </ul>                                                                                                                                                                             | 2 |
| Schopfer 2012 <sup>56</sup><br>(Retrospective Observational) | <ul style="list-style-type: none"> <li>· US hospitals</li> <li>· (Jan 2008-Dec 2008)</li> </ul>                                                     | <ul style="list-style-type: none"> <li>· Population: Hospitals that admitted patients aged ≥18 years</li> <li>· Diagnosis: HF</li> <li>· Sample: N=3,655</li> </ul>       | <ul style="list-style-type: none"> <li>· Dartmouth Atlas</li> <li>· US Census</li> </ul>                                                                        | <ul style="list-style-type: none"> <li>· Age</li> </ul>                                                                                             | <ul style="list-style-type: none"> <li>· Race and Ethnicity</li> <li>· Income</li> <li>· Education</li> <li>Urban/Rural residence</li> </ul> | <ul style="list-style-type: none"> <li>· All-cause Readmission, 30d</li> </ul> | <ul style="list-style-type: none"> <li>· White race: higher odds (OR 1.04, CI 1.01-1.02)</li> <li>· Income: no statistically significant association found</li> <li>· Bachelor's degree or higher: higher odds</li> </ul>                                                      | 3 |

|                                                            |                                                                                                                                                                |                                                                                                                                                              |                                                                                               |                                                                                                            |                                                                                                                    |                                                                                   |                                                                                                                                                                                                                                                                                                                     |   |
|------------------------------------------------------------|----------------------------------------------------------------------------------------------------------------------------------------------------------------|--------------------------------------------------------------------------------------------------------------------------------------------------------------|-----------------------------------------------------------------------------------------------|------------------------------------------------------------------------------------------------------------|--------------------------------------------------------------------------------------------------------------------|-----------------------------------------------------------------------------------|---------------------------------------------------------------------------------------------------------------------------------------------------------------------------------------------------------------------------------------------------------------------------------------------------------------------|---|
|                                                            |                                                                                                                                                                |                                                                                                                                                              |                                                                                               |                                                                                                            |                                                                                                                    |                                                                                   | (OR 1.10, CI 1.01-1.02)                                                                                                                                                                                                                                                                                             |   |
|                                                            |                                                                                                                                                                |                                                                                                                                                              |                                                                                               |                                                                                                            |                                                                                                                    |                                                                                   | <ul style="list-style-type: none"> <li>Urban/rural: no statistically significant association found</li> </ul>                                                                                                                                                                                                       |   |
| Selim 2015 <sup>57*</sup><br>(Retrospective Observational) | <ul style="list-style-type: none"> <li>3 hospitals within the Montefiore Medical Center health system in the Bronx, NY</li> <li>(Jan 2001-Dec 2010)</li> </ul> | <ul style="list-style-type: none"> <li>Population: Hospitalized low SES patients aged ≥18 years</li> <li>Diagnosis: ADHF</li> <li>Sample: N=7,516</li> </ul> | <ul style="list-style-type: none"> <li>EMR</li> <li>Social Security Death Registry</li> </ul> | <ul style="list-style-type: none"> <li>Age</li> <li>Sex</li> </ul>                                         | <ul style="list-style-type: none"> <li>Race and Ethnicity</li> <li>Access to Cardiologist</li> </ul>               | <ul style="list-style-type: none"> <li>All-cause Readmission, 30d, 60d</li> </ul> | <ul style="list-style-type: none"> <li>White (30d): lower risk (HR 0.49, CI 0.29-0.83)</li> <li>White (60d): lower risk (HR 0.58, CI 0.39-0.87)</li> <li>Seen by cardiologist (30d): lower risk (HR 0.76, CI 0.66-0.89, P=0.002)</li> <li>Seen by cardiologist (60d): lower risk (HR 0.81, CI 0.72-0.92)</li> </ul> | 3 |
| Tabit 2017 <sup>60</sup><br>(Retrospective Observational)  | <ul style="list-style-type: none"> <li>University of Chicago Medical Center</li> <li>(Jan 2015-Dec 2015)</li> </ul>                                            | <ul style="list-style-type: none"> <li>Population: Discharged low SES patients aged ≥18 years</li> <li>Diagnosis: ADHF</li> <li>Sample: N=784</li> </ul>     | <ul style="list-style-type: none"> <li>EMR</li> <li>Patient survey</li> </ul>                 | <ul style="list-style-type: none"> <li>Age</li> <li>Sex</li> <li>Race/Ethnicity</li> <li>Income</li> </ul> | <ul style="list-style-type: none"> <li>Education/health literacy</li> <li>Consultation before discharge</li> </ul> | <ul style="list-style-type: none"> <li>All-cause Readmission, 30d, 90d</li> </ul> | <ul style="list-style-type: none"> <li>Intervention group (received consultation, 30d): lower odds (OR 0.592, CI 0.40-0.87)</li> <li>Intervention group (received consultation, 90d): lower odds (OR NR)</li> </ul>                                                                                                 | 3 |
| Tripathi 2018 <sup>61*</sup><br>(Cross-sectional)          | <ul style="list-style-type: none"> <li>HCUP NRD</li> <li>(2013 and 2014)</li> </ul>                                                                            | <ul style="list-style-type: none"> <li>Population: Patients aged ≥18 years admitted to hospitals for LVAD implantation</li> </ul>                            | <ul style="list-style-type: none"> <li>HCUP</li> <li>NRD</li> </ul>                           | <ul style="list-style-type: none"> <li>None</li> </ul>                                                     | <ul style="list-style-type: none"> <li>Age</li> <li>Sex</li> <li>Insurance</li> </ul>                              | <ul style="list-style-type: none"> <li>All-cause Readmission, 90d</li> </ul>      | <ul style="list-style-type: none"> <li>Age: no statistically significant association found</li> <li>Sex: no statistically significant association found</li> </ul>                                                                                                                                                  | 4 |

|                                                              |                                                                                                                        |                                                                                                                                                          |                                                                                                            |                                                                                                       |                                                                                                                                                               |                                                                                  |                                                                                                                                                                                                                                                                                                           |   |
|--------------------------------------------------------------|------------------------------------------------------------------------------------------------------------------------|----------------------------------------------------------------------------------------------------------------------------------------------------------|------------------------------------------------------------------------------------------------------------|-------------------------------------------------------------------------------------------------------|---------------------------------------------------------------------------------------------------------------------------------------------------------------|----------------------------------------------------------------------------------|-----------------------------------------------------------------------------------------------------------------------------------------------------------------------------------------------------------------------------------------------------------------------------------------------------------|---|
|                                                              |                                                                                                                        | <ul style="list-style-type: none"> <li>Sample: N=4,693</li> </ul>                                                                                        |                                                                                                            |                                                                                                       |                                                                                                                                                               |                                                                                  | <ul style="list-style-type: none"> <li>Private insurance: lower odds (OR 0.75, CI 0.66-0.86)</li> <li>Self-pay: lower odds (OR 0.58, CI 0.42-0.81)</li> </ul>                                                                                                                                             |   |
| Vivo 2014 <sup>63*</sup><br>(Prospective Observational)      | <ul style="list-style-type: none"> <li>213 hospitals participating in GWTG-HF</li> <li>(Jan 2005-Dec 2011)</li> </ul>  | <ul style="list-style-type: none"> <li>Population: Medicare FFS patients ≥65 years</li> <li>Principal diagnosis: HF</li> <li>Sample: N=47,149</li> </ul> | <ul style="list-style-type: none"> <li>GWTG-HF registry</li> <li>Medicare inpatient claims data</li> </ul> | <ul style="list-style-type: none"> <li>Age</li> <li>Sex</li> <li>Income</li> <li>Education</li> </ul> | <ul style="list-style-type: none"> <li>Race and Ethnicity</li> </ul>                                                                                          | <ul style="list-style-type: none"> <li>All-Cause Readmission, 30d, 1y</li> </ul> | <ul style="list-style-type: none"> <li>Black/HISP/Asian (30d): no statistically significant association found</li> <li>Black (1y): increased risk (HR 1.10 CI: 1.04-1.16)</li> <li>HISP/Asian (1y): no statistically significant association found</li> </ul>                                             | 2 |
| Bradford 2017 <sup>17</sup><br>(Retrospective Observational) | <ul style="list-style-type: none"> <li>Sharp Memorial Hospital-San Diego, CA</li> <li>(Oct 2008 – Nov 2014)</li> </ul> | <ul style="list-style-type: none"> <li>Population: Discharged patients aged ≥18 years</li> <li>Diagnosis: HF</li> <li>Sample: N=2,420</li> </ul>         | <ul style="list-style-type: none"> <li>EMR</li> </ul>                                                      | <ul style="list-style-type: none"> <li>None</li> </ul>                                                | <ul style="list-style-type: none"> <li>Age</li> <li>Sex</li> <li>Race and Ethnicity</li> <li>Marital status</li> <li>Employment</li> <li>Insurance</li> </ul> | <ul style="list-style-type: none"> <li>HF Readmission, 30d</li> </ul>            | <ul style="list-style-type: none"> <li>Employment (Retired): higher odds (OR 2.30; CI 1.08-4.90)</li> <li>Employment (Disabled): higher odds (OR 2.48; CI, 1.14-5.37).</li> <li>Age, sex, race/ethnicity, marital status, and insurance status: no statistically significant association found</li> </ul> | 3 |
| Carlson 2019 <sup>19</sup><br>(Retrospective Observational)  | <ul style="list-style-type: none"> <li>Community hospital near California-Mexico border</li> </ul>                     | <ul style="list-style-type: none"> <li>Population: Primarily HISP, low SES patients discharged aged ≥65 years</li> </ul>                                 | <ul style="list-style-type: none"> <li>EMR</li> </ul>                                                      | <ul style="list-style-type: none"> <li>Income</li> <li>Length of stay</li> </ul>                      | <ul style="list-style-type: none"> <li>Age</li> <li>Sex</li> <li>Race and Ethnicity</li> </ul>                                                                | <ul style="list-style-type: none"> <li>HF Readmission, 30d</li> </ul>            | <ul style="list-style-type: none"> <li>No statistically significant association found</li> </ul>                                                                                                                                                                                                          | 3 |

|                                                                 |                                                                                                                  |                                                                                                                                                                                         |                                                                                                                  |                                                                                             |                                                                                                                                                  |                                                                          |                                                                                                                                                                                                                                                                                                                                                                                                                                 |   |
|-----------------------------------------------------------------|------------------------------------------------------------------------------------------------------------------|-----------------------------------------------------------------------------------------------------------------------------------------------------------------------------------------|------------------------------------------------------------------------------------------------------------------|---------------------------------------------------------------------------------------------|--------------------------------------------------------------------------------------------------------------------------------------------------|--------------------------------------------------------------------------|---------------------------------------------------------------------------------------------------------------------------------------------------------------------------------------------------------------------------------------------------------------------------------------------------------------------------------------------------------------------------------------------------------------------------------|---|
|                                                                 | <ul style="list-style-type: none"> <li>· (Oct 2013 – Sep 2015)</li> </ul>                                        | <ul style="list-style-type: none"> <li>· Principal Diagnosis: HF</li> <li>· Sample: N=189</li> </ul>                                                                                    |                                                                                                                  |                                                                                             | <ul style="list-style-type: none"> <li>· Language</li> <li>· Marital Status</li> <li>· Living Status</li> </ul>                                  |                                                                          |                                                                                                                                                                                                                                                                                                                                                                                                                                 |   |
| Patel 2020 <sup>52*</sup><br>(Retrospective Observational)      | <ul style="list-style-type: none"> <li>· Emory Health Care System, Atlanta, GA</li> <li>· (2010-2018)</li> </ul> | <ul style="list-style-type: none"> <li>· Population: Admitted AA or White patients ≥18 years</li> <li>· Diagnosis: acute HF</li> <li>· Sample: N=30,630</li> </ul>                      | <ul style="list-style-type: none"> <li>· EMR</li> </ul>                                                          | <ul style="list-style-type: none"> <li>· Age</li> <li>· Sex</li> <li>· Insurance</li> </ul> | <ul style="list-style-type: none"> <li>· Race</li> <li>· HHI</li> </ul>                                                                          | <ul style="list-style-type: none"> <li>· HF Readmission, 30d</li> </ul>  | <ul style="list-style-type: none"> <li>· Black patients: higher risk (RR: 1.45, CI: 1.37-1.54)</li> <li>· HHI: no statistically significant association found</li> </ul>                                                                                                                                                                                                                                                        | 3 |
| Schmeida 2012 <sup>55</sup><br>(Retrospective Observational)    | <ul style="list-style-type: none"> <li>· Acute Inpatient hospitals</li> <li>· (2006-2009)</li> </ul>             | <ul style="list-style-type: none"> <li>· Population: US states with data on discharged Medicare FFS patients aged ≥65 years</li> <li>· Diagnosis: HF</li> <li>· Sample: N=50</li> </ul> | <ul style="list-style-type: none"> <li>· CMS</li> <li>· US Census</li> <li>· Kaiser Family Foundation</li> </ul> | <ul style="list-style-type: none"> <li>· None</li> </ul>                                    | <ul style="list-style-type: none"> <li>· Sex</li> <li>· Race and Ethnicity</li> <li>· Income</li> <li>· Language</li> <li>· Insurance</li> </ul> | <ul style="list-style-type: none"> <li>· HF Readmission, 30d</li> </ul>  | <ul style="list-style-type: none"> <li>· Sex, race: no statistically significant association found</li> <li>· Income: positive association (<math>\beta</math> 0.000046, <math>P=0.006</math>)</li> <li>· Language: negative association (<math>\beta</math> - 0.362255, <math>P=0.50</math>)</li> <li>· Prescription coverage (insurance): positive association (<math>\beta</math> 0.001, <math>P&lt;0.001</math>)</li> </ul> | 3 |
| Dharmarajan 2013 <sup>23</sup><br>(Retrospective Observational) | <ul style="list-style-type: none"> <li>· Acute care hospitals</li> <li>· (2007-2009)</li> </ul>                  | <ul style="list-style-type: none"> <li>· Population: Medicare FFS beneficiaries ≥65 years readmitted within 30 days</li> </ul>                                                          | <ul style="list-style-type: none"> <li>· Medicare claims</li> </ul>                                              | <ul style="list-style-type: none"> <li>· None</li> </ul>                                    | <ul style="list-style-type: none"> <li>· Age</li> <li>· Sex</li> <li>· Race</li> </ul>                                                           | <ul style="list-style-type: none"> <li>· CVD Readmission, 30d</li> </ul> | <ul style="list-style-type: none"> <li>· Age ≥85: higher odds (OR 1.07, CI 1.05-1.10)</li> <li>· Female: higher odds (OR 0.96, CI 0.95-0.98)</li> </ul>                                                                                                                                                                                                                                                                         | 3 |

|                                                             |                                                                                                                                          |                                                                                                                                                                                                                               |                                                                                      |                                                                                                                           |                                                                                                      |                                                                                                                           |                                                                                                                                                                                                                           |   |
|-------------------------------------------------------------|------------------------------------------------------------------------------------------------------------------------------------------|-------------------------------------------------------------------------------------------------------------------------------------------------------------------------------------------------------------------------------|--------------------------------------------------------------------------------------|---------------------------------------------------------------------------------------------------------------------------|------------------------------------------------------------------------------------------------------|---------------------------------------------------------------------------------------------------------------------------|---------------------------------------------------------------------------------------------------------------------------------------------------------------------------------------------------------------------------|---|
|                                                             |                                                                                                                                          | <ul style="list-style-type: none"> <li>after index hospitalization</li> <li>· Diagnosis: HF</li> <li>· Sample: N=1,330,157</li> <li>.</li> </ul>                                                                              |                                                                                      |                                                                                                                           |                                                                                                      |                                                                                                                           | <ul style="list-style-type: none"> <li>· Black: higher odds (OR 1.22, CI 1.19-1.25)</li> </ul>                                                                                                                            |   |
| Eberly 2019 <sup>28*</sup><br>(Retrospective Observational) | <ul style="list-style-type: none"> <li>· Brigham and Women's Hospital, Boston, MA</li> <li>· (Sep 2008-Nov 2017)</li> </ul>              | <ul style="list-style-type: none"> <li>· Population: Black, White, Latinx patients admitted to general medicine or cardiology from ED aged ≥18 years</li> <li>· Principal Diagnosis: HF</li> <li>· Sample: N=1,967</li> </ul> | <ul style="list-style-type: none"> <li>· EMR</li> <li>· MA Death Registry</li> </ul> | <ul style="list-style-type: none"> <li>· Insurance</li> <li>· Neighborhood SES</li> <li>· Language</li> </ul>             | <ul style="list-style-type: none"> <li>· Age</li> <li>· Sex</li> <li>· Race and Ethnicity</li> </ul> | <ul style="list-style-type: none"> <li>· CVD Readmission, 30d</li> </ul>                                                  | <ul style="list-style-type: none"> <li>· Older age: lower risk 50-75 (HR: 0.61, CI: 0.49-0.76); &gt;75 (HR: 0.54, CI 0.43-0.69)</li> <li>· Race: no statistically significant association found</li> <li>.</li> </ul>     | 3 |
| Asthana 2018 <sup>16</sup><br>(Intervention)                | <ul style="list-style-type: none"> <li>· Ben Taub Hospital Harris County Hospital, Houston, TX</li> <li>· (Jul 2015-Dec 2015)</li> </ul> | <ul style="list-style-type: none"> <li>· Population: Un- and under-insured patients in ED aged ≥18 years</li> <li>· Diagnosis: HF</li> <li>· Sample: N=94</li> </ul>                                                          | <ul style="list-style-type: none"> <li>· EMR</li> </ul>                              | <ul style="list-style-type: none"> <li>· Age</li> <li>· Sex</li> <li>· Race and Ethnicity</li> <li>· Insurance</li> </ul> | <ul style="list-style-type: none"> <li>· Education</li> </ul>                                        | <ul style="list-style-type: none"> <li>· HF Hospital Readmission, 30d, 90d</li> <li>· HF ED Revisits, 30d, 90d</li> </ul> | <ul style="list-style-type: none"> <li>· Hospital readmission 30d, 90d: no statistically significant changes found (30d and 90d)</li> <li>· ED 30d RRR 59% (4.80-82.5)</li> <li>· ED 90d RRR 43.7% (9.51-64.9)</li> </ul> | 2 |
| Medical Devices and Transplantation                         |                                                                                                                                          |                                                                                                                                                                                                                               |                                                                                      |                                                                                                                           |                                                                                                      |                                                                                                                           |                                                                                                                                                                                                                           |   |
| Ahmed 2018 <sup>13*</sup><br>(Retrospective Observational)  | <ul style="list-style-type: none"> <li>· University of Florida (Jan 2008-Dec 2015)</li> </ul>                                            | <ul style="list-style-type: none"> <li>· Population: Patients ≥18 years with LVAD implant, PS</li> </ul>                                                                                                                      | <ul style="list-style-type: none"> <li>EMR</li> </ul>                                | <ul style="list-style-type: none"> <li>· Age</li> <li>· Sex</li> </ul>                                                    | <ul style="list-style-type: none"> <li>· Insurance</li> <li>· Education</li> </ul>                   | <ul style="list-style-type: none"> <li>· Readmission, 30d</li> </ul>                                                      | <ul style="list-style-type: none"> <li>· No statistically significant association found</li> </ul>                                                                                                                        | 3 |



|                                                               |                                                                                                                                       |                                                                                                                              |                                                                                        |                                                                                                |                                                                                                    |                     |                                                                                                                                                                                          |   |
|---------------------------------------------------------------|---------------------------------------------------------------------------------------------------------------------------------------|------------------------------------------------------------------------------------------------------------------------------|----------------------------------------------------------------------------------------|------------------------------------------------------------------------------------------------|----------------------------------------------------------------------------------------------------|---------------------|------------------------------------------------------------------------------------------------------------------------------------------------------------------------------------------|---|
|                                                               |                                                                                                                                       | assessment, 1 year or more post-op<br><br>· Sample: N=111                                                                    |                                                                                        | · Race                                                                                         | · Income<br><br>· Marital status<br><br>· Urban/ rural residence                                   |                     |                                                                                                                                                                                          |   |
| Ehsan 2019 <sup>29</sup><br><br>(Retrospective Observational) | · Three states that underwent Medicaid expansion (KY, NJ, and MD) and two states that did not expand (FL and NC)<br><br>· (2012-2015) | · Population: Patients aged 18-64 years discharged with continuous-flow LVAD and covered by Medicaid<br><br>· Sample: N=624  | · State Inpatient Database<br><br>· American Hospital Association Survey<br><br>· AHRF | · Age<br><br>· Sex<br><br>· Income<br><br>· Urban/rural residence<br><br>· Sex<br><br>· Income | · Race and Ethnicity<br><br>· Insurance                                                            | · LVAD utilization  | · Race: no statistically significant association found<br><br>· Medicaid expansion states & public insurance: increased utilization (IRR: 5.26; CI:1.23-22.57).                          | 3 |
| Flint 2021 <sup>31</sup><br><br>(Prospective Observational)   | · 6 LVAD programs in the Midwest, East and Intermountain West<br><br>· (2015 and 2017)                                                | · Population: Patients who were actively being considered for destination therapy LVAD aged ≥18 years<br><br>· Sample: N=212 | · DECIDE-LVAD Trial                                                                    | · None                                                                                         | · Race and Ethnicity<br><br>· Marital Status<br><br>· Insurance<br><br>· Education<br><br>· Income | · LVAD implantation | · Partnered (marriage status): higher odds (OR: 2.33, CI 1.12-4.85).<br><br>· Income, race, educational attainment, or insurance status: No statistically significant associations found | 2 |
| Tripathi 2018 <sup>61*</sup><br><br>(Cross-sectional)         | · HCUP NRD<br><br>· (2013 and 2014)                                                                                                   | · Population: Patients aged ≥18 years admitted to hospitals for LVAD implantation<br><br>· Sample: N=4,693                   | · HCUP<br><br>· NRD                                                                    | · None                                                                                         | · Age<br><br>· Sex<br><br>· Insurance                                                              | · Complications     | · Age: unit increases increased odds (OR 1.01, CI 1.01-1.02)<br><br>· Female: lower odds (OR 0.73, CI 0.62-0.85)                                                                         |   |

|                                                                  |                                                                                                                    |                                                                                                                                                                                                                 |                                                                                            |                                                                                  |                                                                                                          |                                                                                                     |                                                                                                                                                                                                                                                                                   |   |
|------------------------------------------------------------------|--------------------------------------------------------------------------------------------------------------------|-----------------------------------------------------------------------------------------------------------------------------------------------------------------------------------------------------------------|--------------------------------------------------------------------------------------------|----------------------------------------------------------------------------------|----------------------------------------------------------------------------------------------------------|-----------------------------------------------------------------------------------------------------|-----------------------------------------------------------------------------------------------------------------------------------------------------------------------------------------------------------------------------------------------------------------------------------|---|
|                                                                  |                                                                                                                    |                                                                                                                                                                                                                 |                                                                                            |                                                                                  |                                                                                                          |                                                                                                     | <ul style="list-style-type: none"> <li>Insurance: no statistically significant association found</li> </ul>                                                                                                                                                                       |   |
| Emani 2017 <sup>30</sup><br>(Retrospective Observational)        | <ul style="list-style-type: none"> <li>Organ sharing registry</li> <li>(Jun 2006 - Mar 2015)</li> </ul>            | <ul style="list-style-type: none"> <li>Population: First-time HTx candidates <math>\geq 18</math> and <math>&lt; 65</math> years who had BTT LVAD support while wait-listed</li> <li>Sample: N=3,353</li> </ul> | <ul style="list-style-type: none"> <li>United Network of Organ Sharing registry</li> </ul> | <ul style="list-style-type: none"> <li>Age</li> <li>Sex</li> <li>Race</li> </ul> | <ul style="list-style-type: none"> <li>Education</li> <li>Insurance</li> <li>Neighborhood SES</li> </ul> | <ul style="list-style-type: none"> <li>Transplantation Probability</li> </ul>                       | <ul style="list-style-type: none"> <li>Education: no statistically significant association found</li> <li>Medicaid: higher risk SHR: 1.56, CI: 1.14-2.14)</li> <li>Neighborhoods in the second-lowest SES quintile: higher risk (SHR: 1.62; CI: 1.01-2.58).</li> </ul>            | 3 |
| Mehra 2009 <sup>48</sup><br>(Prospective Observational)          | <ul style="list-style-type: none"> <li>OP cardiology and multi-specialty practices</li> <li>(2005-2007)</li> </ul> | <ul style="list-style-type: none"> <li>Population: Patients enrolled in IMPROVE HF aged <math>\geq 18</math> years</li> <li>Sample: N=3,659</li> </ul>                                                          | <ul style="list-style-type: none"> <li>IMPROVE HF registry</li> </ul>                      | <ul style="list-style-type: none"> <li>None</li> </ul>                           | <ul style="list-style-type: none"> <li>Age</li> <li>Sex</li> <li>Race</li> <li>Insurance</li> </ul>      | <ul style="list-style-type: none"> <li>ICD Utilization</li> </ul>                                   | <ul style="list-style-type: none"> <li>Older ages: lower odds (OR 0.87 per 10 years, CI 0.82- 0.93)</li> <li>Men: higher odds (OR 1.4, CI 1.22-1.61)</li> <li>Black race: lower odds (OR 0.75, CI 0.60-0.94)</li> <li>No insurance: lower odds (OR 0.45, CI 0.26-0.78)</li> </ul> | 2 |
| Yandrapalli 2019 <sup>70*</sup><br>(Retrospective Observational) | <ul style="list-style-type: none"> <li>Acute care hospitals</li> <li>(2005 – 2014)</li> </ul>                      | <ul style="list-style-type: none"> <li>Population: patients <math>\geq 18</math> years without concomitant ACS</li> <li>Diagnosis: HFH</li> <li>Sample: N=8,333,752</li> </ul>                                  | <ul style="list-style-type: none"> <li>HCUP NIS</li> </ul>                                 | <ul style="list-style-type: none"> <li>None</li> </ul>                           | <ul style="list-style-type: none"> <li>Age</li> <li>Sex</li> <li>Race and Ethnicity</li> </ul>           | <ul style="list-style-type: none"> <li>Mechanical circulatory support device utilization</li> </ul> | <ul style="list-style-type: none"> <li>Age: older had higher rates (<math>\geq 80</math> years (41.4); 65-79 (29.2); 45-64 (20.6); 18-44 (17.7); <math>p &lt; 0.001</math>)</li> <li>Females: higher (30.6 v. 25.4, <math>p &lt; 0.001</math>)</li> </ul>                         | 3 |

|                                                                         |                                                                                                                         |                                                                                                                                                                                       |                                                                                                 |                                                                                                                                                     |                                                                                                                                                                  |                                                                         |                                                                                                                                                                                                       |   |
|-------------------------------------------------------------------------|-------------------------------------------------------------------------------------------------------------------------|---------------------------------------------------------------------------------------------------------------------------------------------------------------------------------------|-------------------------------------------------------------------------------------------------|-----------------------------------------------------------------------------------------------------------------------------------------------------|------------------------------------------------------------------------------------------------------------------------------------------------------------------|-------------------------------------------------------------------------|-------------------------------------------------------------------------------------------------------------------------------------------------------------------------------------------------------|---|
|                                                                         |                                                                                                                         |                                                                                                                                                                                       |                                                                                                 |                                                                                                                                                     |                                                                                                                                                                  |                                                                         | <ul style="list-style-type: none"> <li>· Race: White had highest rates (white (28.8); HISP (25.8); Black (22.3); patients <math>p &lt; 0.001</math>)</li> </ul>                                       |   |
| <p>Russell 2019<sup>54*</sup></p> <p>(Cross-sectional)</p>              | <ul style="list-style-type: none"> <li>· NYC</li> <li>· (2013-2017)</li> </ul>                                          | <ul style="list-style-type: none"> <li>· Hospice patients <math>\geq 18</math> years</li> <li>· Diagnosis: HF</li> <li>· Sample: N=1,498</li> </ul>                                   | <ul style="list-style-type: none"> <li>· EMR</li> <li>· Interviews</li> </ul>                   | <ul style="list-style-type: none"> <li>· None</li> </ul>                                                                                            | <ul style="list-style-type: none"> <li>· Age</li> <li>· Sex</li> <li>· Race and Ethnicity</li> <li>· Marital Status</li> <li>· Insurance Status</li> </ul>       | <ul style="list-style-type: none"> <li>· Loss Of Eligibility</li> </ul> | <ul style="list-style-type: none"> <li>· HISP: higher odds (AOR 2.32, CI 1.23–4.34)</li> <li>· Age, sex, race, marital status, insurance status: no statistically significant associations</li> </ul> | 4 |
| Other <sup>1</sup>                                                      |                                                                                                                         |                                                                                                                                                                                       |                                                                                                 |                                                                                                                                                     |                                                                                                                                                                  |                                                                         |                                                                                                                                                                                                       |   |
| <p>Ahmed 2018<sup>13*</sup></p> <p>(Retrospective Observational)</p>    | <ul style="list-style-type: none"> <li>· University of Florida</li> <li>· (Jan 2008-Dec 2015)</li> </ul>                | <ul style="list-style-type: none"> <li>· Population: Patients <math>\geq 18</math> years with LVAD implant, PS assessment, 1 year or more post-op</li> <li>· Sample: N=111</li> </ul> | <ul style="list-style-type: none"> <li>· EMR</li> </ul>                                         | <ul style="list-style-type: none"> <li>· Age</li> <li>· Sex</li> <li>· Race</li> </ul>                                                              | <ul style="list-style-type: none"> <li>· Insurance</li> <li>· Education</li> <li>· Income</li> <li>· Marital status</li> <li>· Urban/ rural residence</li> </ul> | <ul style="list-style-type: none"> <li>· LOS</li> </ul>                 | <ul style="list-style-type: none"> <li>· No statistically significant associations found</li> </ul>                                                                                                   | 3 |
| <p>Knighton 2018<sup>40*</sup></p> <p>(Retrospective Observational)</p> | <ul style="list-style-type: none"> <li>· Inter-mountain Healthcare System in Utah</li> <li>· (2010 and 2014)</li> </ul> | <ul style="list-style-type: none"> <li>· Population: inpatient. Age inclusion criteria NR</li> <li>· Diagnosis: HF</li> <li>· Sample: N=4,737</li> </ul>                              | <ul style="list-style-type: none"> <li>· EMR</li> <li>· State death certificate data</li> </ul> | <ul style="list-style-type: none"> <li>· Age</li> <li>· Sex</li> <li>· Race and Ethnicity</li> <li>· Marital Status</li> <li>· Insurance</li> </ul> | <ul style="list-style-type: none"> <li>· Neighborhood SES</li> <li>· Faith</li> <li>· Urban/Rural residence</li> </ul>                                           | <ul style="list-style-type: none"> <li>· Index encounter LOS</li> </ul> | <ul style="list-style-type: none"> <li>· No statistically significant associations found</li> </ul>                                                                                                   | 3 |

|                                                               |                                                                                                            |                                                                                                                                                                                              |                                                                           |                                                                                                                                      |                                                                                                                                                  |                                                                         |                                                                                                                                                                                                                                                                                                                                                                     |   |
|---------------------------------------------------------------|------------------------------------------------------------------------------------------------------------|----------------------------------------------------------------------------------------------------------------------------------------------------------------------------------------------|---------------------------------------------------------------------------|--------------------------------------------------------------------------------------------------------------------------------------|--------------------------------------------------------------------------------------------------------------------------------------------------|-------------------------------------------------------------------------|---------------------------------------------------------------------------------------------------------------------------------------------------------------------------------------------------------------------------------------------------------------------------------------------------------------------------------------------------------------------|---|
| Russell 2019 <sup>54*</sup><br>(Cross-sectional)              | <ul style="list-style-type: none"> <li>NYC</li> <li>(2013-2017)</li> </ul>                                 | <ul style="list-style-type: none"> <li>Hospice patients <math>\geq 18</math> years</li> <li>Diagnosis: HF</li> <li>Sample: N=1,498</li> </ul>                                                | <ul style="list-style-type: none"> <li>EMR</li> <li>Interviews</li> </ul> | <ul style="list-style-type: none"> <li>None</li> </ul>                                                                               | <ul style="list-style-type: none"> <li>Age</li> <li>Sex</li> <li>Race and Ethnicity</li> <li>Marital Status</li> <li>Insurance Status</li> </ul> | <ul style="list-style-type: none"> <li>Acute hospitalization</li> </ul> | <ul style="list-style-type: none"> <li>Age: 18 to 74 (AOR 2.10, CI 1.34–3.28) and 75 to 84 (AOR 1.79, CI 1.24–2.62)</li> <li>HISP (AOR 2.99, CI 1.99–4.50), African American (AOR 2.06, CI 1.31–3.24), and Asian/other patients (AOR 1.96, CI 1.08–3.57)</li> <li>Sex, marital status, insurance status: no statistically significant associations found</li> </ul> | 4 |
| Akwo 2016 <sup>14</sup><br>(Prospective Observational)        | <ul style="list-style-type: none"> <li>Urban/rural: 12 southeastern states</li> <li>(2002-2010)</li> </ul> | <ul style="list-style-type: none"> <li>AA and non-HISP White low SES patients aged 40-79 years covered by Medicare or Medicaid and participating in SCCS</li> <li>Sample N=27,078</li> </ul> | <ul style="list-style-type: none"> <li>SCCS</li> <li>US Census</li> </ul> | <ul style="list-style-type: none"> <li>Age</li> <li>Sex</li> <li>Race and Ethnicity</li> <li>HHI</li> <li>Education Level</li> </ul> | <ul style="list-style-type: none"> <li>Neighborhood SES</li> </ul>                                                                               | <ul style="list-style-type: none"> <li>Incident HF</li> </ul>           | <ul style="list-style-type: none"> <li>Risk increased with unit increases in neighborhood deprivation (HR 1.12, CI 1.07-1.18)</li> </ul>                                                                                                                                                                                                                            |   |
| Breathett 2021 <sup>18</sup><br>(Retrospective Observational) | <ul style="list-style-type: none"> <li>WHI Study</li> <li>(1993-2018)</li> </ul>                           | <ul style="list-style-type: none"> <li>Population: Post-menopausal AA and HISP women in WHI study with <math>\geq 1</math> HF risk factors and a high HF genetic risk score. Age</li> </ul>  | <ul style="list-style-type: none"> <li>WHI study</li> </ul>               | <ul style="list-style-type: none"> <li>Sex</li> <li>Race and Ethnicity</li> <li>Age</li> <li>Education</li> <li>Income</li> </ul>    | <ul style="list-style-type: none"> <li>PS factors</li> </ul>                                                                                     | <ul style="list-style-type: none"> <li>Incident HFH</li> </ul>          | <ul style="list-style-type: none"> <li>No statistically significant association found</li> </ul>                                                                                                                                                                                                                                                                    | 3 |

|                                                                        |                                                                                                                         |                                                                                                                                                                                                                                             |                                                                                                             |                                                                                             |                                                                                                                                                      |                                                                                        |                                                                                                                                                                                                                                                                                                                                                                                    |   |
|------------------------------------------------------------------------|-------------------------------------------------------------------------------------------------------------------------|---------------------------------------------------------------------------------------------------------------------------------------------------------------------------------------------------------------------------------------------|-------------------------------------------------------------------------------------------------------------|---------------------------------------------------------------------------------------------|------------------------------------------------------------------------------------------------------------------------------------------------------|----------------------------------------------------------------------------------------|------------------------------------------------------------------------------------------------------------------------------------------------------------------------------------------------------------------------------------------------------------------------------------------------------------------------------------------------------------------------------------|---|
|                                                                        |                                                                                                                         | <p>inclusion criteria NR.</p> <ul style="list-style-type: none"> <li>Sample: N=11,327</li> </ul>                                                                                                                                            |                                                                                                             | <ul style="list-style-type: none"> <li>Insurance</li> </ul>                                 |                                                                                                                                                      |                                                                                        |                                                                                                                                                                                                                                                                                                                                                                                    |   |
| <p>Pinheiro 2020<sup>53</sup></p> <p>(Prospective Observational)</p>   | <ul style="list-style-type: none"> <li>48 US states and DC</li> <li>(2003-Dec 2016)</li> </ul>                          | <ul style="list-style-type: none"> <li>Population: REGARDS study participants (community-dwelling black and white men and women ≥45 years from 48 US states and DC)</li> <li>Diagnosis: at risk for HF</li> <li>Sample: N=25,790</li> </ul> | <ul style="list-style-type: none"> <li>REGARDS study data</li> <li>Phone interviews</li> <li>EMR</li> </ul> | <ul style="list-style-type: none"> <li>Age</li> <li>Sex</li> <li>Region</li> </ul>          | <ul style="list-style-type: none"> <li>Race and Ethnicity</li> <li>Education</li> <li>Income</li> <li>Insurance</li> <li>Neighborhood SES</li> </ul> | <ul style="list-style-type: none"> <li>Incident HFH</li> </ul>                         | <ul style="list-style-type: none"> <li>Black race: higher risk (aHR: 1.23, CI 1.09-1.40)</li> <li>&lt; High school education higher risk (aHR 1.75, CI 1.50-2.03)</li> <li>&lt;\$35,000 income: higher risk (aHR: 1.78, CI 1.55-2.03)</li> <li>No insurance: higher risk (aHR 1.68, CI 1.29-2.19)</li> <li>Neighborhood &gt;25% below poverty (aHR: 1.21, CI 1.05-1.40)</li> </ul> | 2 |
| <p>Wadhera 2018<sup>64*</sup></p> <p>(Retrospective Observational)</p> | <ul style="list-style-type: none"> <li>391 GWTG registry sites across 40 states</li> <li>(Jan 2010-Jun 2017)</li> </ul> | <ul style="list-style-type: none"> <li>Population: Low-income patients &lt;65 years, not eligible for Medicare</li> <li>Diagnosis: HFH</li> <li>Sample: N=58,804</li> </ul>                                                                 | <ul style="list-style-type: none"> <li>GWTG HF Registry</li> </ul>                                          | <ul style="list-style-type: none"> <li>Age</li> <li>Sex</li> <li>Race/ Ethnicity</li> </ul> | <ul style="list-style-type: none"> <li>Medicaid expansion</li> </ul>                                                                                 | <ul style="list-style-type: none"> <li>HF inpatient care (defect free care)</li> </ul> | <ul style="list-style-type: none"> <li>Expansion states (defect free care): higher odds (aOR: 1.06, CI 1.03-1.08)</li> </ul>                                                                                                                                                                                                                                                       | 3 |
| <p>Ziaieian 2017<sup>71</sup></p> <p>(Retrospective Observational)</p> | <ul style="list-style-type: none"> <li>Acute care hospitals</li> <li>(2002-2013)</li> </ul>                             | <ul style="list-style-type: none"> <li>Population: Patients ≥18 years</li> </ul>                                                                                                                                                            | <ul style="list-style-type: none"> <li>HCUP NIS</li> </ul>                                                  | <ul style="list-style-type: none"> <li>Age</li> </ul>                                       | <ul style="list-style-type: none"> <li>Sex</li> <li>Race and Ethnicity</li> </ul>                                                                    | <ul style="list-style-type: none"> <li>HFH</li> </ul>                                  | <ul style="list-style-type: none"> <li>Black men and women: higher compared with whites</li> </ul>                                                                                                                                                                                                                                                                                 | 3 |

|                                                      |                                                                                                                                              |                                                                                                                                                                            |                                                                                                                                                                                     |                                                                                                                                                      |                                                                                    |                    |                                                                                                                                                                                 |   |
|------------------------------------------------------|----------------------------------------------------------------------------------------------------------------------------------------------|----------------------------------------------------------------------------------------------------------------------------------------------------------------------------|-------------------------------------------------------------------------------------------------------------------------------------------------------------------------------------|------------------------------------------------------------------------------------------------------------------------------------------------------|------------------------------------------------------------------------------------|--------------------|---------------------------------------------------------------------------------------------------------------------------------------------------------------------------------|---|
|                                                      |                                                                                                                                              | <ul style="list-style-type: none"> <li>· Diagnosis: HF</li> <li>·</li> <li>· Sample: N=12,783,478</li> </ul>                                                               |                                                                                                                                                                                     |                                                                                                                                                      |                                                                                    |                    | <p>(229% and 240%, respectively)</p> <ul style="list-style-type: none"> <li>· HISP men and women: higher rates, (men: 32% to 4%, p trend=0.047; women: 55% to 43%)</li> </ul>   |   |
| Wu 2013 <sup>67</sup><br>(Prospective Observational) | Academic medical center<br><br>· (NR)                                                                                                        | <ul style="list-style-type: none"> <li>· Population: Patients ≥18</li> <li>· Diagnosis: HF</li> <li>· Sample: N=218</li> </ul>                                             | · REMOTE-HF study data                                                                                                                                                              | <ul style="list-style-type: none"> <li>· Age</li> <li>· Sex</li> <li>· Race and Ethnicity</li> <li>· Living Status</li> </ul>                        | · PSS and Medication Adherence                                                     | · Time to CV event | <ul style="list-style-type: none"> <li>· Low PSS and nonadherence: higher risk (HR 2.50, CI 1.20-5.30)</li> </ul>                                                               | 2 |
| Wu 2016 <sup>68</sup><br>(Prospective Observational) | <ul style="list-style-type: none"> <li>· Rural US areas in of CA, NV, KY</li> <li>· (NR)</li> </ul>                                          | <ul style="list-style-type: none"> <li>· Population: Patients ≥18 living independently</li> <li>· Diagnosis: HFH in the past 12 months</li> <li>· Sample: N=575</li> </ul> | · REMOTE-HF study data                                                                                                                                                              | <ul style="list-style-type: none"> <li>· Sex</li> <li>· Race/ Ethnicity</li> <li>· Income</li> <li>· Marital status</li> <li>· Employment</li> </ul> | <ul style="list-style-type: none"> <li>· Age</li> <li>· Health literacy</li> </ul> | · Time to CV event | <ul style="list-style-type: none"> <li>· Older patients: higher risk (HR 1.491, CI, 1.12–1.99)</li> <li>· Low health literacy: higher risk (HR: 1.84, CI: 1.40–2.43)</li> </ul> | 2 |
| Wu 2010 <sup>69</sup><br>(Prospective Observational) | <ul style="list-style-type: none"> <li>· OP cardiology clinics and inpatient cardiology units in central Kentucky</li> <li>· (NR)</li> </ul> | <ul style="list-style-type: none"> <li>· Patients ≥18 years</li> <li>· Diagnosis: with diagnosis of CHF patients</li> <li>· Sample: N=136</li> </ul>                       | <ul style="list-style-type: none"> <li>· Patient/ family interviews</li> <li>· EMR</li> <li>· Hospital administrative data</li> <li>· Medication Event Monitoring System</li> </ul> | <ul style="list-style-type: none"> <li>· Age</li> <li>· Race and Ethnicity</li> <li>· Marital Status</li> <li>· Perceived Social Support</li> </ul>  | · Urban/Rural Status                                                               | · Time to CV event | <ul style="list-style-type: none"> <li>· Rurality: lower risk (HR 0.56, CI NR)</li> </ul>                                                                                       | 2 |

|                                                            |                                                                                                                                                |                                                                                                                                                  |                                                                                                                     |                                                                                                                                                                    |                                                                                                                                   |                                                                                                |                                                                                                                                                                                         |   |
|------------------------------------------------------------|------------------------------------------------------------------------------------------------------------------------------------------------|--------------------------------------------------------------------------------------------------------------------------------------------------|---------------------------------------------------------------------------------------------------------------------|--------------------------------------------------------------------------------------------------------------------------------------------------------------------|-----------------------------------------------------------------------------------------------------------------------------------|------------------------------------------------------------------------------------------------|-----------------------------------------------------------------------------------------------------------------------------------------------------------------------------------------|---|
| Heisler 2013 <sup>35</sup><br>(Intervention)               | <ul style="list-style-type: none"> <li>Non-profit community-based teaching hospital</li> <li>(May 2007-Oct 2010)</li> </ul>                    | <ul style="list-style-type: none"> <li>Patients ≥18 years</li> <li>Diagnosis: HF</li> <li>Sample: N=266</li> </ul>                               | <ul style="list-style-type: none"> <li>Hospital administrative data</li> <li>Survey</li> </ul>                      | <ul style="list-style-type: none"> <li>Age</li> <li>Sex</li> <li>Race and Ethnicity</li> </ul>                                                                     | <ul style="list-style-type: none"> <li>Nurse care management (NCM) v. reciprocal peer support (RPS) program</li> </ul>            | <ul style="list-style-type: none"> <li>Time to CVD event</li> </ul>                            | <ul style="list-style-type: none"> <li>No statistically significant association found</li> </ul>                                                                                        | 1 |
| Cox 2017 <sup>20</sup><br>(Prospective Observational)      | <ul style="list-style-type: none"> <li>Large quaternary health system Texas Medical Center, Houston, TX</li> <li>(NR)</li> </ul>               | <ul style="list-style-type: none"> <li>Population: Hospitalized patients ≥18 years</li> <li>Diagnosis: HF</li> <li>Sample: N=264</li> </ul>      | <ul style="list-style-type: none"> <li>Primary survey data</li> </ul>                                               | <ul style="list-style-type: none"> <li>Age</li> <li>Sex</li> <li>Race</li> <li>Marital Status</li> <li>Insurance</li> <li>Education</li> <li>Employment</li> </ul> | <ul style="list-style-type: none"> <li>Health literacy</li> </ul>                                                                 | <ul style="list-style-type: none"> <li>Healthcare use (Readmission + ED visit), 30d</li> </ul> | <ul style="list-style-type: none"> <li>Low health literacy (BHLS ≤9): higher odds (OR: 1.80, CI: 1.04 - 3.11)</li> </ul>                                                                | 2 |
| DeLia 2014 <sup>22*</sup><br>(Retrospective Observational) | <ul style="list-style-type: none"> <li>Hospitals and clinics (2007-2010)</li> </ul>                                                            | <ul style="list-style-type: none"> <li>Population: Medicare enrollees ≥65 years</li> <li>Diagnosis: ≥1 HFH</li> <li>Sample: N=233,641</li> </ul> | <ul style="list-style-type: none"> <li>MPCD</li> </ul>                                                              | <ul style="list-style-type: none"> <li>None</li> </ul>                                                                                                             | <ul style="list-style-type: none"> <li>Age</li> <li>Sex</li> <li>Race and Ethnicity</li> <li>Insurance</li> <li>Region</li> </ul> | <ul style="list-style-type: none"> <li>Treat and release, 30d</li> </ul>                       | <ul style="list-style-type: none"> <li>No statistically significant change in readmission rates found</li> </ul>                                                                        | 3 |
| Kociol 2011 <sup>41</sup><br>(Retrospective Observational) | <ul style="list-style-type: none"> <li>225 hospitals participating in OPTIMIZE or GWTG-HF registries</li> <li>(Jan 2003 – Dec 2006)</li> </ul> | <ul style="list-style-type: none"> <li>Population: Patients ≥65 years admitted to hospital for worsening symptoms or discharged</li> </ul>       | <ul style="list-style-type: none"> <li>Medicare FFS claims</li> <li>OPTIMIZE</li> <li>GWTG-HF registries</li> </ul> | <ul style="list-style-type: none"> <li>None</li> </ul>                                                                                                             | <ul style="list-style-type: none"> <li>Age</li> <li>Sex</li> <li>Race</li> <li>Urban/rural residence</li> </ul>                   | <ul style="list-style-type: none"> <li>Early physician follow-up</li> </ul>                    | <ul style="list-style-type: none"> <li>Age 70-74: higher odds (OR 1.12, CI 1.03-1.22); &gt;75 (OR 0.87, CI 0.83 - 0.91)</li> <li>Women: lower odds (OR 0.87, CI 0.83 - 0.91)</li> </ul> | 3 |

|                                                                     |                                                                                                                                         |                                                                                                                                              |                                                                                                                                                                                         |                                                                                                               |                                                                                                                      |                                                                 |                                                                                                                                                                                                                                                                                                                   |   |
|---------------------------------------------------------------------|-----------------------------------------------------------------------------------------------------------------------------------------|----------------------------------------------------------------------------------------------------------------------------------------------|-----------------------------------------------------------------------------------------------------------------------------------------------------------------------------------------|---------------------------------------------------------------------------------------------------------------|----------------------------------------------------------------------------------------------------------------------|-----------------------------------------------------------------|-------------------------------------------------------------------------------------------------------------------------------------------------------------------------------------------------------------------------------------------------------------------------------------------------------------------|---|
|                                                                     |                                                                                                                                         | <ul style="list-style-type: none"> <li>Primary Diagnosis: HF</li> <li>Sample: N=30,136</li> </ul>                                            |                                                                                                                                                                                         |                                                                                                               | <ul style="list-style-type: none"> <li>Income</li> <li>Physician density</li> </ul>                                  |                                                                 | <ul style="list-style-type: none"> <li>Black patients: lower odds (OR 0.84, CI 0.77 - 0.92)</li> <li>Rural areas: lower odds (OR 0.84, CI 0.78 - 0.91)</li> <li>Lower SES: lower odds (OR 0.79, CI 0.74-0.85)</li> <li>Living near high physician concentration: higher odds (OR 1.29, CI 1.12 - 1.48)</li> </ul> |   |
| Manemann 2018 <sup>44*</sup><br><br>(Prospective Observational)     | <ul style="list-style-type: none"> <li>Clinics and hospitals in 11 southeast Minnesota counties</li> <li>(Jan 2013-Mar 2013)</li> </ul> | <ul style="list-style-type: none"> <li>Population: ≥18 years</li> <li>Diagnosis: first-ever HF diagnosis</li> <li>Sample: N=3,867</li> </ul> | <ul style="list-style-type: none"> <li>Patient-Reported Outcomes Measurement Information System</li> <li>Social Isolation Short Form</li> <li>Rochester Epidemiology Project</li> </ul> | <ul style="list-style-type: none"> <li>Age</li> <li>Sex</li> <li>Education</li> <li>Marital Status</li> </ul> | <ul style="list-style-type: none"> <li>Social Support</li> </ul>                                                     | <ul style="list-style-type: none"> <li>ED visits</li> </ul>     | <ul style="list-style-type: none"> <li>High social isolation: higher risk (HR 1.5, CI, 1.09–2.27)</li> </ul>                                                                                                                                                                                                      | 2 |
| McNaughton 2015 <sup>46*</sup><br><br>(Retrospective Observational) | <ul style="list-style-type: none"> <li>Quaternary care hospital</li> <li>(Nov 2010 – Jun 2013)</li> </ul>                               | <ul style="list-style-type: none"> <li>Population: Patients discharged from an acute HFH aged ≥18 years</li> </ul>                           | <ul style="list-style-type: none"> <li>Health Literacy Screening study data</li> <li>EMR</li> </ul>                                                                                     | <ul style="list-style-type: none"> <li>Insurance</li> </ul>                                                   | <ul style="list-style-type: none"> <li>Age</li> <li>Sex</li> <li>Race</li> <li>Education/ health literacy</li> </ul> | <ul style="list-style-type: none"> <li>ED visit, 90d</li> </ul> | <ul style="list-style-type: none"> <li>No statistically significant association found</li> </ul>                                                                                                                                                                                                                  | 3 |



|                                                                           |                                                                                                                                                                        |                                                                                                                                                |                                                                         |                                                        |                                                                                                                                                                                                  |                                                                            |                                                                                                                                                                                                                                                                                                                                                             |   |
|---------------------------------------------------------------------------|------------------------------------------------------------------------------------------------------------------------------------------------------------------------|------------------------------------------------------------------------------------------------------------------------------------------------|-------------------------------------------------------------------------|--------------------------------------------------------|--------------------------------------------------------------------------------------------------------------------------------------------------------------------------------------------------|----------------------------------------------------------------------------|-------------------------------------------------------------------------------------------------------------------------------------------------------------------------------------------------------------------------------------------------------------------------------------------------------------------------------------------------------------|---|
|                                                                           |                                                                                                                                                                        | <ul style="list-style-type: none"> <li>Sample: N=2,132</li> </ul>                                                                              |                                                                         |                                                        |                                                                                                                                                                                                  |                                                                            |                                                                                                                                                                                                                                                                                                                                                             |   |
| <p>Distelhorst 2018<sup>25</sup></p> <p>(Retrospective Observational)</p> | <ul style="list-style-type: none"> <li>Urban: 3 community hospitals within the Cleveland Clinic Health System in Northeast Ohio</li> <li>19-months dates NR</li> </ul> | <ul style="list-style-type: none"> <li>Population: Patients discharged with de-compensated HF aged ≥18 years</li> <li>Sample: N=701</li> </ul> | <ul style="list-style-type: none"> <li>EMR</li> </ul>                   | <ul style="list-style-type: none"> <li>None</li> </ul> | <ul style="list-style-type: none"> <li>Age</li> <li>Sex</li> <li>Race and Ethnicity</li> <li>Insurance status</li> <li>Marital status</li> <li>Social support</li> <li>Access to care</li> </ul> | <ul style="list-style-type: none"> <li>Appointment Adherence</li> </ul>    | <ul style="list-style-type: none"> <li>Age, sex, insurance status, marital status, social support, access to care: no statistically significant associations found</li> <li>Nonwhite race higher odds (OR 1.85; CI, 1.08-3.16)</li> </ul>                                                                                                                   | 3 |
| <p>Wray 2019<sup>66</sup></p> <p>(Retrospective Observational)</p>        | <ul style="list-style-type: none"> <li>VHA hospitals and clinics</li> <li>(2011-2012)</li> </ul>                                                                       | <ul style="list-style-type: none"> <li>Population: Veterans ≥65 years</li> <li>Diagnosis: HFH and CHF</li> <li>Sample: N=1,500</li> </ul>      | <ul style="list-style-type: none"> <li>VHA chart abstraction</li> </ul> | <ul style="list-style-type: none"> <li>None</li> </ul> | <ul style="list-style-type: none"> <li>Age</li> <li>Race/Ethnicity</li> <li>Social support</li> <li>Housing</li> <li>Living status</li> </ul>                                                    | <ul style="list-style-type: none"> <li>Missed clinic visits</li> </ul>     | <ul style="list-style-type: none"> <li>Older age: lower odds (OR 0.96, CI 0.94–0.98)</li> <li>Black race: higher odds (OR 2.71, CI 1.38–5.75)</li> <li>Social support: no statistically significant association found</li> <li>Marginal housing: higher odds (OR 5.69, CI 2.28-14.73)</li> <li>Living alone: higher odds (OR 1.58, CI 1.10-2.24)</li> </ul> | 3 |
| <p>Irani 2019<sup>36</sup></p>                                            | <ul style="list-style-type: none"> <li>Cardiology practices in</li> </ul>                                                                                              | <ul style="list-style-type: none"> <li>Patients aged 50-85 years</li> </ul>                                                                    | <ul style="list-style-type: none"> <li>HEART ABC study data</li> </ul>  | <ul style="list-style-type: none"> <li>Sex</li> </ul>  | <ul style="list-style-type: none"> <li>Age</li> </ul>                                                                                                                                            | <ul style="list-style-type: none"> <li>HF Self-Care Maintenance</li> </ul> | <ul style="list-style-type: none"> <li>Age, living arrangements: no</li> </ul>                                                                                                                                                                                                                                                                              | 4 |

|                                                      |                                                             |                                                                                                                        |                           |                                                                                 |                                                                                                  |                                                                                                        |                                                                                                                                                                                                                                                                        |   |
|------------------------------------------------------|-------------------------------------------------------------|------------------------------------------------------------------------------------------------------------------------|---------------------------|---------------------------------------------------------------------------------|--------------------------------------------------------------------------------------------------|--------------------------------------------------------------------------------------------------------|------------------------------------------------------------------------------------------------------------------------------------------------------------------------------------------------------------------------------------------------------------------------|---|
| (Cross-sectional)                                    | two major hospitals<br><br>· (August 2010 and October 2013) | · Sample: N=370                                                                                                        |                           | · Race and Ethnicity                                                            | · Living Arrangement<br><br>· Social Support<br><br>· Self-Efficacy                              |                                                                                                        | statistically significant associations found<br><br>· Social support ( $\beta = .129$ , $P = .008$ )<br><br>· Self-efficacy ( $\beta = .337$ , $P < .001$ )                                                                                                            |   |
| Johansson 2020                                       | · Pinellas County, FL<br><br>· NR                           | · Patients $\geq 55$ years with HF and enrolled in Program of All-Inclusive Care for the Elderly<br><br>· Sample: N=51 | · Patient surveys         | · Age<br><br>· Sex<br><br>· Race<br><br>· Living Status<br><br>· Social Support | · Nurse-led telephone support intervention supplemented with mobile phone SMS text messages      | · HF Self-Care<br><br>· HF Knowledge<br><br>· Medication Adherence<br><br>· Physical and Mental Health | · Improved HF self-care maintenance ( $t_{49}=0.66$ ; $P=.01$ )<br><br>· Improved HF knowledge ( $t_{49}=0.71$ ; $P=.01$ )<br><br>· Improved medication adherence ( $t_{49}=0.92$ ; $P=.01$ )<br><br>· Improved physical and mental health ( $t_{49}=0.81$ ; $P=.01$ ) | 4 |
| Russell 2019 <sup>54*</sup><br><br>(Cross-sectional) | · NYC<br><br>· (2013-2017)                                  | · Hospice patients $\geq 18$ years<br><br>· Diagnosis: HF<br><br>· Sample: N=1.498                                     | · EMR<br><br>· Interviews | · None                                                                          | · Age<br><br>· Sex<br><br>· Race and Ethnicity<br><br>· Marital Status<br><br>· Insurance Status | · Elective Revocation                                                                                  | · Age 75 to 84 years: higher odds (AOR 1.99, CI 1.18–3.38)<br><br>· Sex, Race and Ethnicity, marital status, insurance status: no statistically significant associations found                                                                                         | 4 |
| Russell 2019 <sup>54*</sup><br><br>(Cross-sectional) | · NYC<br><br>· (2013-2017)                                  | · Hospice patients $\geq 18$ years<br><br>· Diagnosis: HF                                                              | · EMR<br><br>· Interviews | · None                                                                          | · Age<br><br>· Sex<br><br>· Race and Ethnicity                                                   | · Transfer                                                                                             | · HISP: higher odds (AOR 2.25, CI 1.10–4.62)<br><br>· Asian/other: higher odds (AOR 2.25 CI 1.04–6.18)                                                                                                                                                                 | 4 |

|                                                                                                                                                                                                                                                                                                                                                                                                                                                                                                                                                                                                                                                                                                                                                                                                                                                                                                                                                                                                                                                                                                                                                                                                                                                                                                                                   |  |                                                                   |  |                                                                                                                                                                                                                                                                                                                                                                                                                                                                                                                                                                                                                                                                                                                                                                                                                                                                                                                                                                                                                                                                                                                                                                                                               |                                                                                            |  |                                                                                                                                               |  |
|-----------------------------------------------------------------------------------------------------------------------------------------------------------------------------------------------------------------------------------------------------------------------------------------------------------------------------------------------------------------------------------------------------------------------------------------------------------------------------------------------------------------------------------------------------------------------------------------------------------------------------------------------------------------------------------------------------------------------------------------------------------------------------------------------------------------------------------------------------------------------------------------------------------------------------------------------------------------------------------------------------------------------------------------------------------------------------------------------------------------------------------------------------------------------------------------------------------------------------------------------------------------------------------------------------------------------------------|--|-------------------------------------------------------------------|--|---------------------------------------------------------------------------------------------------------------------------------------------------------------------------------------------------------------------------------------------------------------------------------------------------------------------------------------------------------------------------------------------------------------------------------------------------------------------------------------------------------------------------------------------------------------------------------------------------------------------------------------------------------------------------------------------------------------------------------------------------------------------------------------------------------------------------------------------------------------------------------------------------------------------------------------------------------------------------------------------------------------------------------------------------------------------------------------------------------------------------------------------------------------------------------------------------------------|--------------------------------------------------------------------------------------------|--|-----------------------------------------------------------------------------------------------------------------------------------------------|--|
|                                                                                                                                                                                                                                                                                                                                                                                                                                                                                                                                                                                                                                                                                                                                                                                                                                                                                                                                                                                                                                                                                                                                                                                                                                                                                                                                   |  | <ul style="list-style-type: none"> <li>Sample: N=1.498</li> </ul> |  |                                                                                                                                                                                                                                                                                                                                                                                                                                                                                                                                                                                                                                                                                                                                                                                                                                                                                                                                                                                                                                                                                                                                                                                                               | <ul style="list-style-type: none"> <li>Marital Status</li> <li>Insurance Status</li> </ul> |  | <ul style="list-style-type: none"> <li>Age, sex, marital status, insurance status: no statistically significant associations found</li> </ul> |  |
| <p>*More than one HF outcome</p> <p>† Statistical method to interpret results vary by study. The effect of the SDOH variable on the given outcome is addressed in this column</p> <p>‡ QR, quality rating was assigned based on a modified Oxford Centre for Evidence-based Medicine (cebm.net) rating scheme and evaluated for interrater comparability. Using this methodology, studies were rated 1 (highest quality) to 5 (lowest quality). Studies receiving the highest rating were properly powered and conducted randomized clinical trials (RCTs); well-designed controlled trials without randomization or prospective comparative cohort trials were rated 2; case control and retrospective cohort studies were rated 3; case series and cross-sectional studies were rated 4; opinion and case reports (5 rating) were not included in this review.</p> <p>§ A hospital readmission is an unplanned episode in which a patient who had been discharged from a hospital is admitted again within a certain period of time (e.g., 30-, 60-, 90-days) after the index admission for HF.</p> <p>   A heart failure hospitalization refers to a hospitalization for which the International Classification of Diseases (ICD) clinical modification discharge code for HF was used as the first listed discharge code.</p> |  |                                                                   |  | AA- African American<br>ACS- Acute Coronary Syndrome<br>ACS HCUP - American Community Survey Healthcare Cost and Utilization Project<br>ADHF- Acute Decompensated Heart Failure<br>aHR- Adjusted Hazard Ratio<br>AHRF - Area Health Resource File<br>AMI- Acute Myocardial Infarction<br>aOR- Adjusted Odds Ratio<br>ARIC- Atherosclerosis Risk in Communities<br>BHLS- Brief Health Literacy Screen<br>BTT- Bridge to Transplant<br>CA - California<br>CHF- Chronic Heart Failure<br>CI- Confidence Interval<br>CMS- Centers for Medicare & Medicaid Services<br>CV- Cardiovascular<br>DECIDE-LVAD- Shared Decision Support Intervention for Patients and their Caregivers Offered Destination Therapy for End-Stage Heart Failure<br>ED- Emergency Department<br>EM- Effect Modifier<br>EMR- Electronic Medical Record<br>FL - Florida<br>FFS- Fee for Service<br>GM- General Medicine<br>GWTG HF- Get with The Guidelines-Heart Failure<br>HCUP-Healthcare Cost and Utilization Project<br>HF- Heart Failure<br>HFH- Heart Failure Hospitalization<br>HHI- Household Income<br>HISP- Hispanic<br>HRS- Health and Retirement Study<br>HTx- Heart Transplant<br>ICD- Implantable Cardioverter-Defibrillators |                                                                                            |  |                                                                                                                                               |  |

IMPROVE HF- Improve the Use of Evidence-Based Heart Failure Therapies in the Outpatient Setting  
INTERMACS- Interagency Registry for Mechanically Assisted Circulatory Support  
IRR- Incidence Rate Ratio  
KY - Kentucky  
LOS- Length of Stay  
LVAD- Left Ventricular Assist Device  
MA - Massachusetts  
MD - Maryland  
MHI- Median Household Income  
MN - Minnesota  
MPCD- Multi-Payer Claims Database  
MS - Mississippi  
NC – North Carolina  
NDI- Neighborhood Deprivation Index  
NHANES- US National Health and Nutrition Examination Surveys  
NIS- National Inpatient Sample  
nINC- Neighborhood Median Household Income  
NJ – New Jersey  
NR- Not Reported  
NRD- US Nationwide Readmission Database  
NV - Nevada  
NYC – New York City  
OH - Ohio  
OP- Outpatient  
OPTIMIZE- Organized Program to Initiate Lifesaving Treatment in Hospitalized Patients with Heart Failure  
OR- Odds Ratio  
PS- Psychosocial  
REGARDS- Reasons for Geographic and Racial Differences in Stroke  
REMOTE-HF- Rural Education to Improve Outcomes in Heart Failure  
RRR- Relative Risk Reduction  
RSMR-Risk-Standardized Mortality Ratio  
RSRR- Risk-Standardized Readmission Rate  
RS- Risk standardized  
SCCS- Southern Community Cohort Study  
SES- Socioeconomic Status  
SHR- Subhazard Ratios  
SSDI- Social Security Death Index  
TX - Texas

|                                                                                                             |
|-------------------------------------------------------------------------------------------------------------|
| VHA- Veterans Health Affairs<br>WHI- Women's Health Initiative<br>30d- 30 day<br>1y- 1 year<br>90d- 90 days |
|-------------------------------------------------------------------------------------------------------------|

**Table S3. Summary of SDoH Analyzed in Studies (K=59).**

| <b>Social Determinant of Health</b>          | <b>Studies</b>                                        |
|----------------------------------------------|-------------------------------------------------------|
| Race and Ethnicity                           | 13-20,22,23,25-43,45-50,52-57,59,60,62-71             |
| Age                                          | 13-20,22-30,33-54,56-71                               |
| Sex                                          | 13-20,22-30,32-55,57-71                               |
| Insurance                                    | 13,15-17,22,23,25,27-32,38,41,42,47-50,53-55,59,61-63 |
| Income/wealth                                | 13,26,27,30,31,38,41,42,47,53,55,56,59,64             |
| Marital status                               | 13,15,17,19,25,31,43,47,54,58,65                      |
| Education/health literacy                    | 13,20,27,30,31,33,42,46,53,56,59,68                   |
| Individual/neighborhood socioeconomic status | 14,15,28,32,38,40,42,50,52,53,59,62                   |
| Urban/rural residence                        | 13,40,41,47,56,59,62,68,69                            |
| Social support                               | 21,25,39,44,58,59,66,67                               |
| Living status                                | 18,19,43,47,59,62,66                                  |
| Employment                                   | 17,27                                                 |
| Social (in)stability                         | 15,38,66                                              |
| Language                                     | 19,28,55                                              |
| Faith/spirituality                           | 18,40,51                                              |
| Children                                     | 47                                                    |

**SDoH – Social Determinants of Health**

**Table S4. Scales Utilized in Studies.**

| <b>Social Determinant of Health</b> | <b>Scale/Measure</b>                                                                            | <b>Studies</b> |
|-------------------------------------|-------------------------------------------------------------------------------------------------|----------------|
| Neighborhood Socioeconomic Status   | Area Deprivation Index                                                                          | 28,38,40,42,62 |
|                                     | Social Deprivation Index                                                                        | 52             |
|                                     | Neighborhood Deprivation Index                                                                  | 14             |
| Health literacy                     | Brief Health Literacy Screen                                                                    | 20,46          |
|                                     | Short Test of Functional Health Literacy in Adults                                              | 68             |
| Spirituality/Faith                  | Brief Multidimensional Measure of Religiousness and Spirituality                                | 51             |
| Social support                      | Medical Outcome Study Social Support                                                            | 16,58          |
|                                     | Psychosocial Assessment of Candidates for Transplantation                                       | 21             |
|                                     | Functional Social Support Questionnaire                                                         | 37             |
|                                     | Lubben Social Network Scale                                                                     | 39             |
|                                     | Interpersonal Support Evaluation List                                                           | 39             |
|                                     | Patient-Reported Outcomes Measurement Information System Social Isolation Short Form 4a v2.0.13 | 44             |
|                                     | Enhancing Recovery In Coronary Heart Disease patients Social Support Instrument                 | 51             |
|                                     | Multidimensional Perceived Social Support Scale                                                 | 67             |

Figure S1. PRISMA study flow diagram.

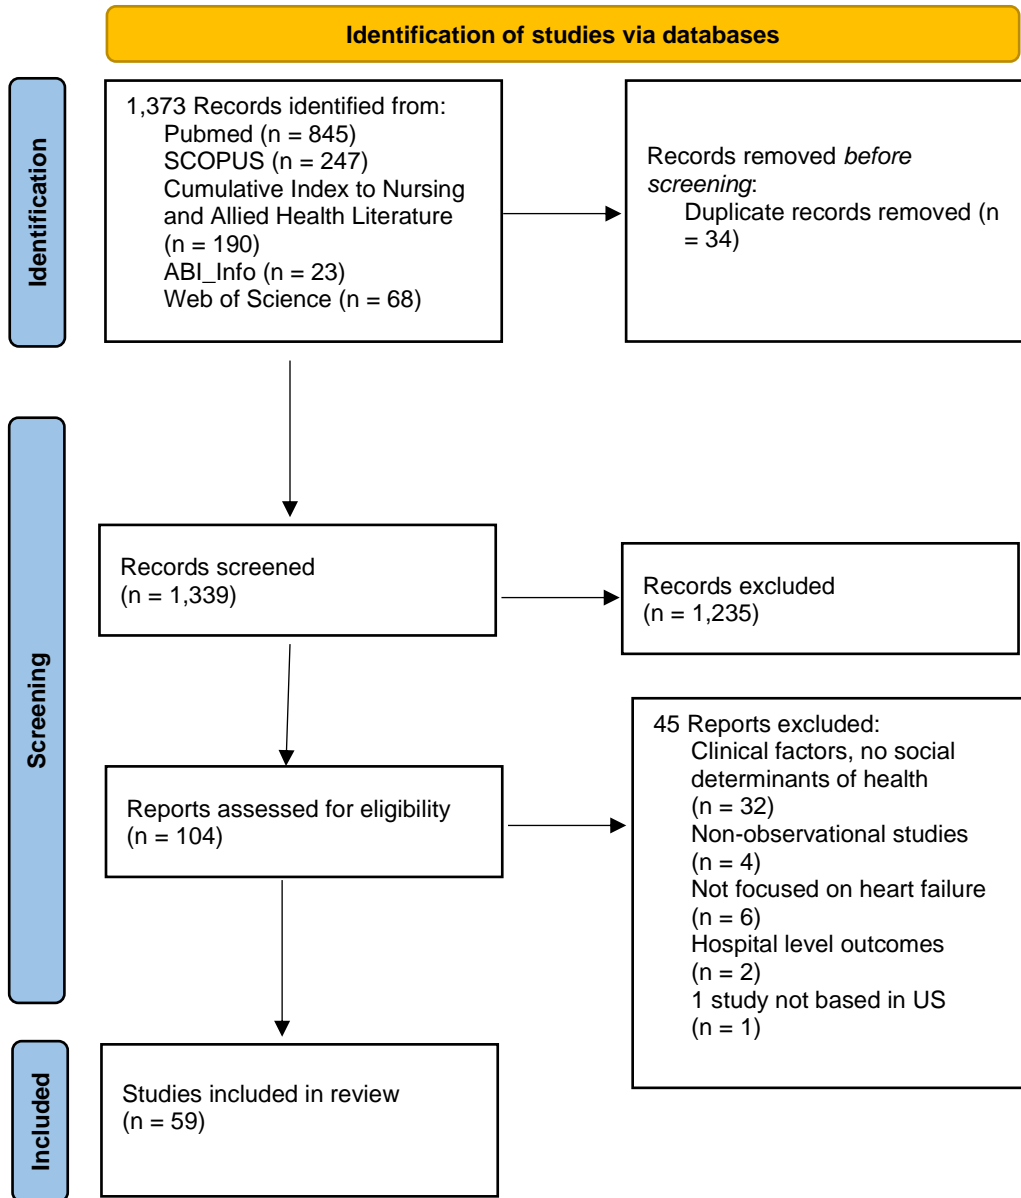

Supplement: JAH3-12-e026590-s001.pdf [file JAH3-12-e026590-s001.pdf]
